# Supplementary material for: miR-182-3p/Myadm contribute to pulmonary artery hypertension vascular remodeling via a KLF4/p21-dependent mechanism
Source: PubMed Central journal article supplement (PMC7196306; doi:10.7150/thno.44687), 2020-04-25
Supplement: thnov10p5581s1.pdf [file thnov10p5581s1.pdf]

**Supplemental Figure and Figure Legends**

Figure S1.

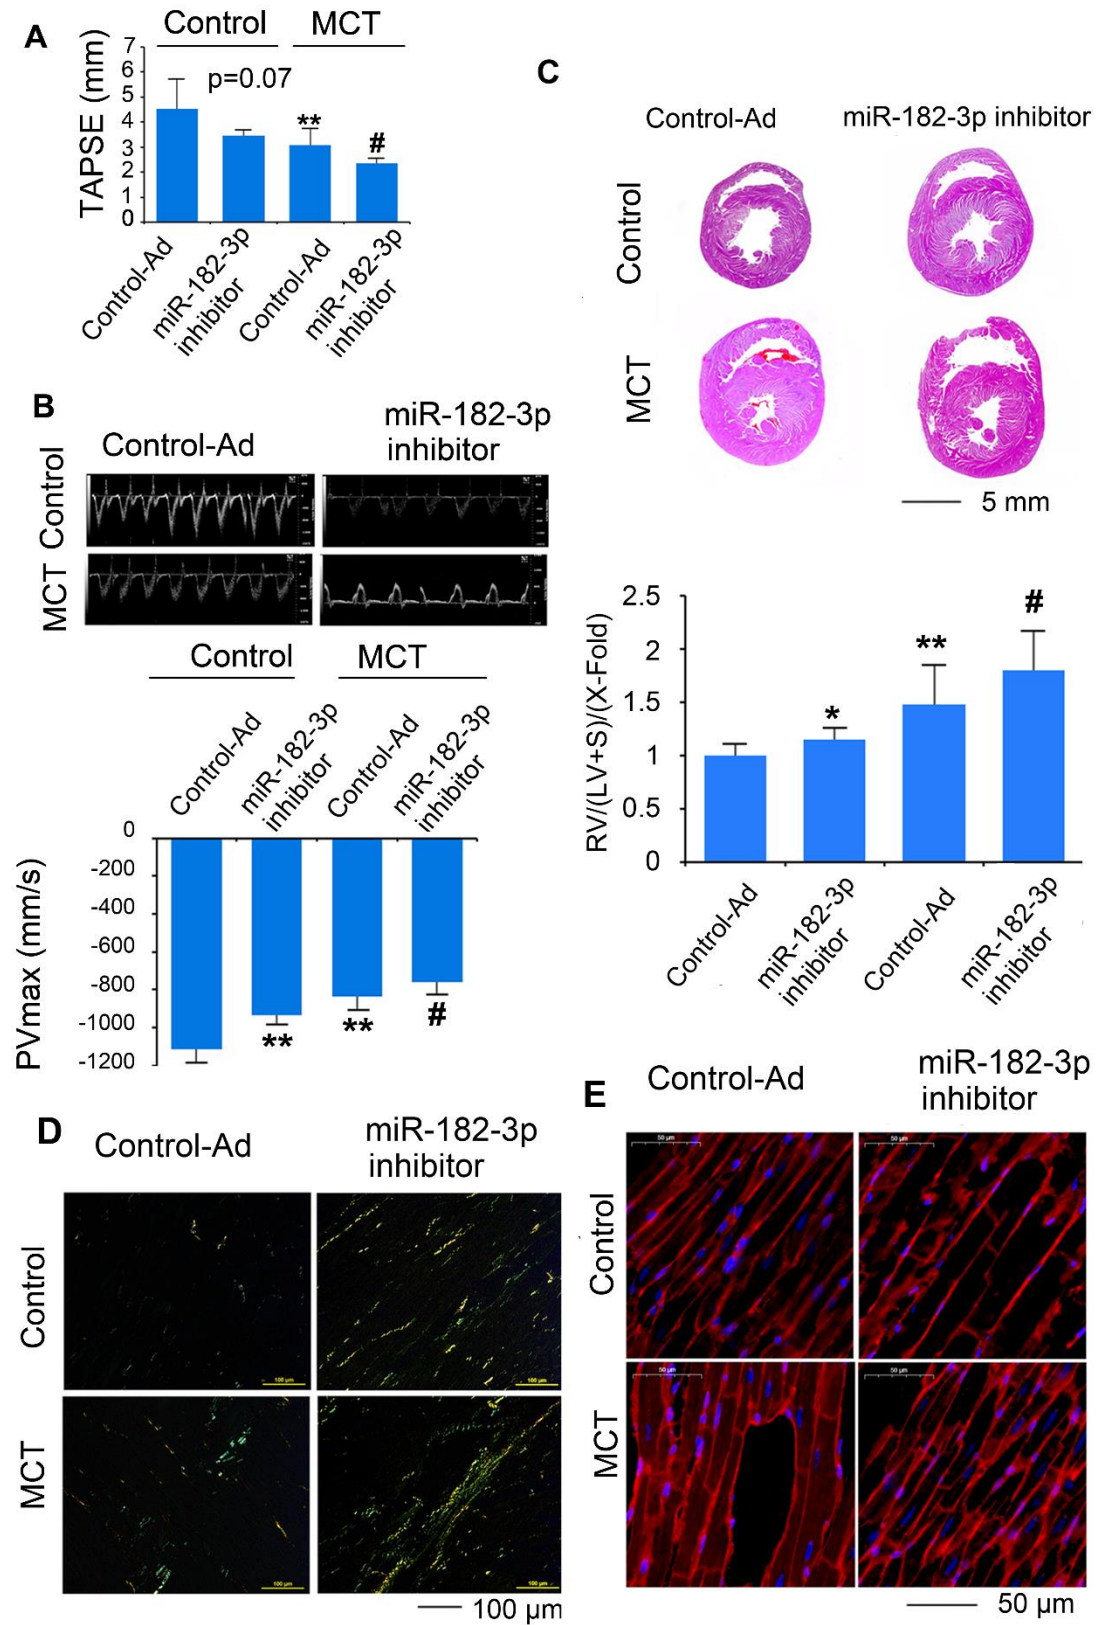

Figure S1. miR-182-3p inhibitor augments the effects of MCT on pulmonary hemodynamics change and cardiac remodeling in rats. Rats were transduced with either recombinant adenovirus expressing inhibitor (shRNA) against the miR-182-3p (miR-182-3p inhibitor,  $10^{10}$  pfu/mL) or the control virus (Control-Ad) and then were injected subcutaneously using one dose of monocrotaline (MCT, 60 mg/kg body weight, normal saline was used as normal control). The tricuspid annular displacement (TAPSE; A) and pulmonary velocity maximum (PVmax; B) were detected using pulmonary pulsed-wave Doppler echocardiography. Whole hearts were embedded in paraffinum, sliced into 5- $\mu$ m sections, and then hematoxylin and eosin (HE) staining was performed. The right ventricular hypertrophy (right ventricle/left ventricle + septum [RV/(LV+S)]) was measured (C). Sirius red (D) and AlexFluo-568 conjugated wheat germ agglutinin (E) staining was performed followed by examination with a light microscope (Nikon) were used to detect disorder of collagen deposition and myocardial fibrosis. The images are shown at 20 $\times$ magnification and 40 $\times$ magnification, respectively. Bar size were indicated in each picture. \* $p < 0.05$ , \*\* $p < 0.01$  vs rats injected with control virus. # $p < 0.05$ , ## $p < 0.01$  vs rats treated with control virus and MCT. n=6-8 per group. n=6-8 each group.

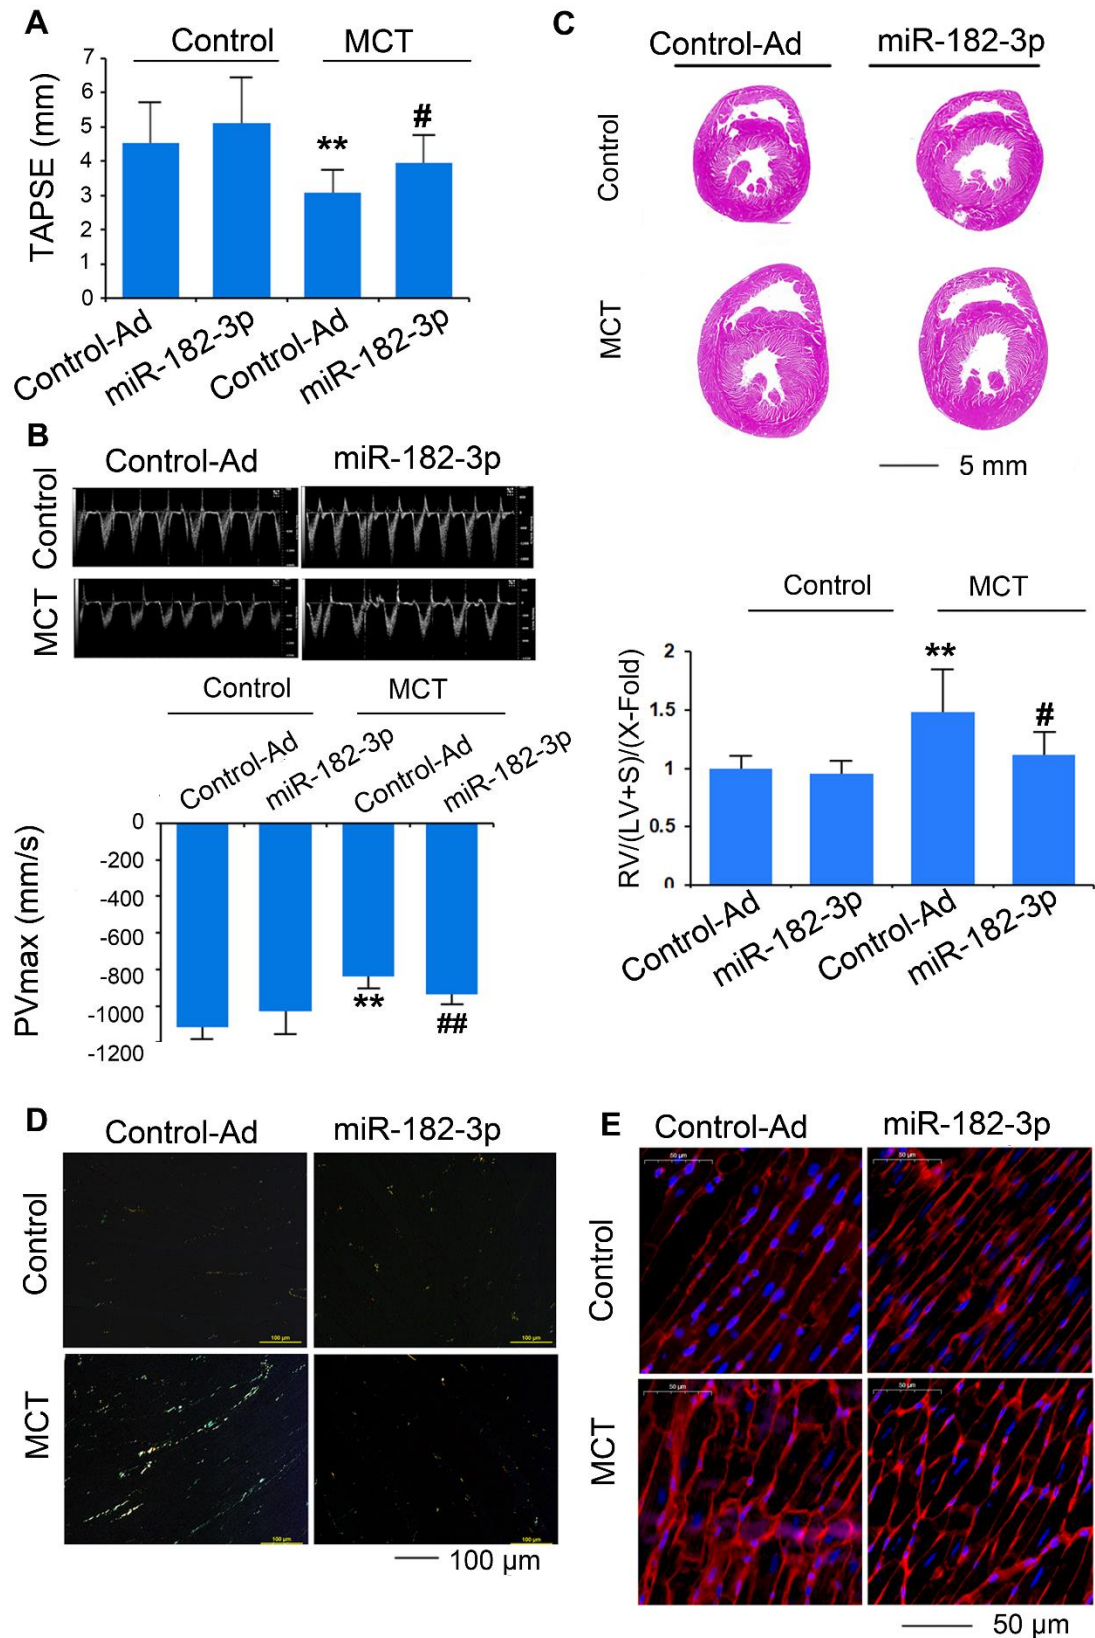

Figure S2. miR-182-3p regulates on pulmonary hemodynamics change and cardiac remodeling in MCT-induced PAH rats. Rats were transduced with either recombinant

adenovirus expresses the miR-182-3p (miR-182-3p,  $10^{10}$  pfu/mL) or the control virus (Control-Ad) and then were injected subcutaneously using one dose of MCT saline was used as normal control). The TAPSE (A) and PVmax (B) were detected using Doppler echocardiography. Whole hearts were embedded in paraffinum, sliced into 5- $\mu$ m sections, and then the HE staining was performed. The right ventricular hypertrophy (right ventricle/left ventricle + septum [RV/(LV+S)]) were measured (C). Sirius red (D) and AlexFluo-568 conjugated wheat germ agglutinin (E) staining was performed followed by examination with a light microscope (Nikon) were used to detect disorder of collagen deposition and myocardial fibrosis. The images are shown at 20 $\times$  and 40  $\times$  magnification, respectively. Bar size were indicated in each picture. \* $p < 0.05$ , \*\* $p < 0.01$  vs rats injected with control virus. # $p < 0.05$ , ## $p < 0.01$  vs rats treated with control virus and MCT. n=6-8 per group. n=6-8 each group.

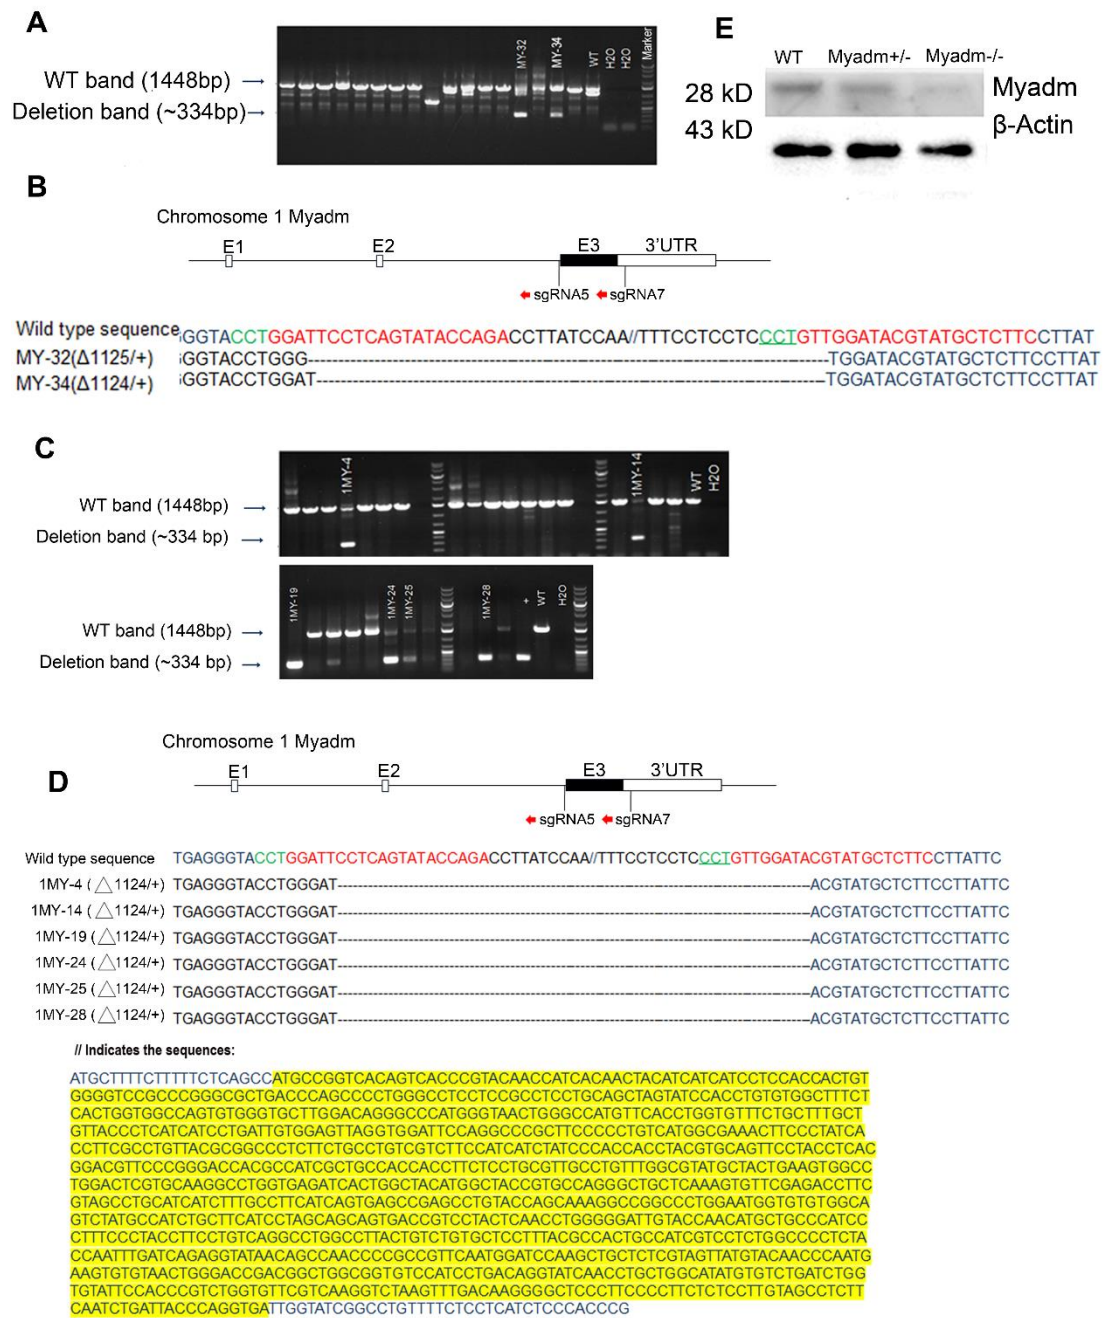

Figure S3. Identification of various Myadm genotype rats. Myadm<sup>-/-</sup> rats were generated and systematized using the CRISPR/Cas9 system. A. Agarose gel electrophoresis showing the PCR product of the target region derived from DNA isolated from the tails of MYADM knockout founder rats. Two out of 16 founder rats demonstrated site-specific sequence deletion (334 bp in length). B. Sequence analysis of the two founders at the target site. The sgRNA sequence is labelled in red, and the

PAM sequence is labelled in green. C. Agarose gel electrophoresis showing the PCR product of the target region derived from DNA isolated from the F1 hybrids. D. Sequence analysis of the  $Myadm^{-/+}$  heterozygote at the target site. The sgRNA sequence is labeled in red, and the PAM sequence is labeled in green. E. The expression levels of  $Myadm$  in the lungs from the  $Myadm^{+/+}$  (Wild-type),  $Myadm^{+/-}$  (heterozygote) and  $Myadm$  knockout ( $Myadm^{-/-}$ ) rats.



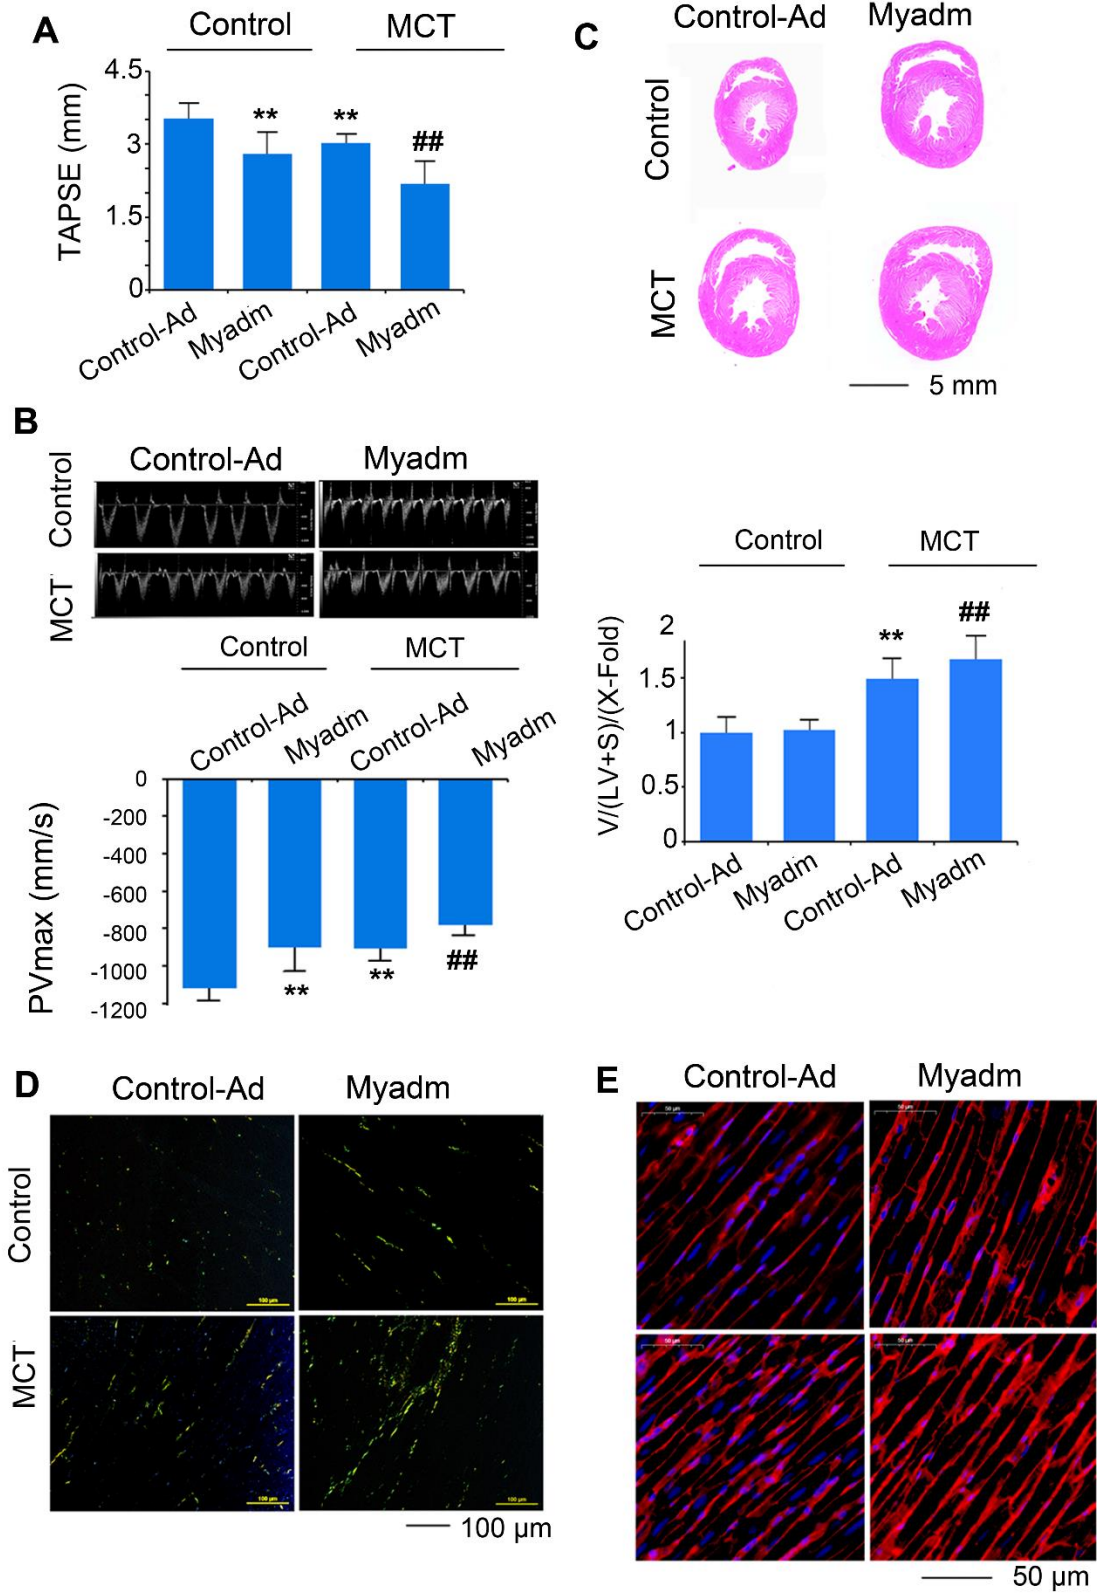

Figure S4. Myadm aggravates the pulmonary hemodynamics change and cardiac remodeling in MCT-induced PAH rats. Rats were transfected with either recombinant

adenovirus overexpresses Myadm gene (Myadm,  $10^{10}$  pfu/mL) or the control virus (Control-Ad) and then were injected subcutaneously using one dose of MCT (normal saline was used as normal control). The TAPSE (A) and PVmax (B) were detected using Doppler echocardiography. Whole hearts sections were embedded for HE staining, the right ventricular hypertrophy was measured (C). Sirius red (D) and AlexFluo-568 conjugated wheat germ agglutinin (E) staining were performed followed by examination with a light microscope (Nikon). The images are shown at 20 $\times$  and 40 $\times$  magnification, respectively. Bar size were indicated in each picture. \* $p < 0.05$ , \*\* $p < 0.01$  vs rats injected with control virus. # $p < 0.05$ , ## $p < 0.01$  vs rats treated with control virus and MCT. n=6-8 per group. n=6-8 each group.



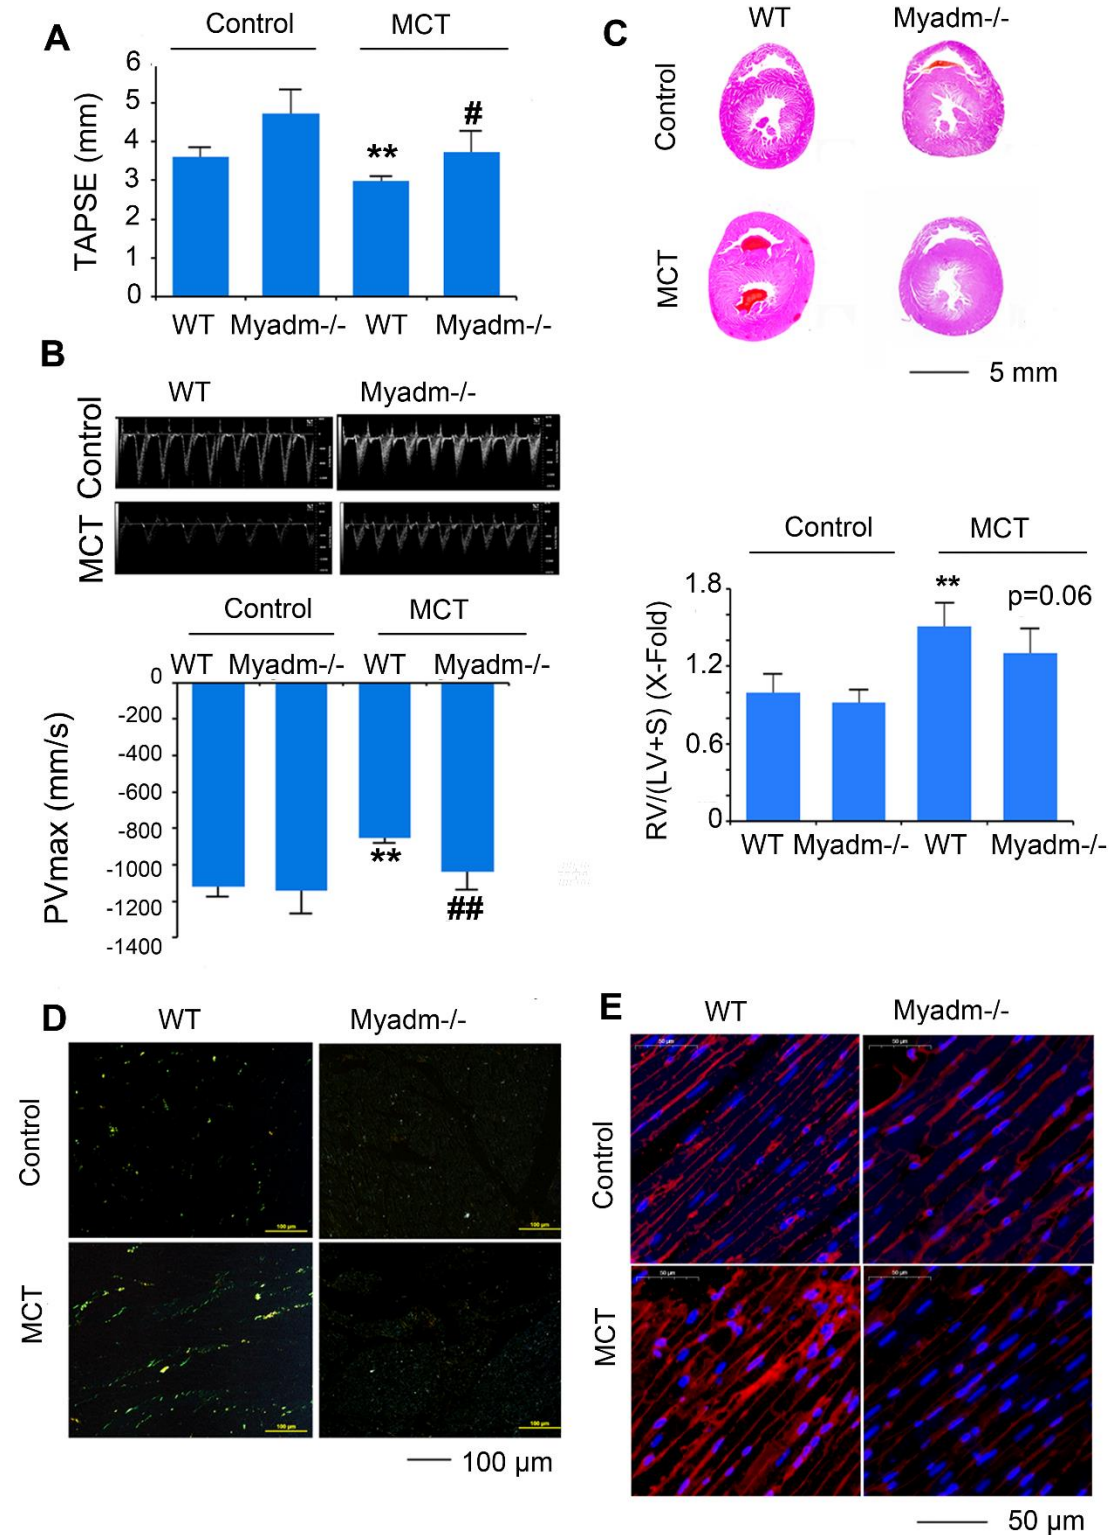

Figure S5. Knock down of *Myadm* inhibits pulmonary hemodynamics change and cardiac remodeling in MCT-induced PAH rats. *Myadm*<sup>-/-</sup> rats or the wild-type siblings of *Myadm* knockout rats (WT) were injected subcutaneously using MCT (normal

saline was used as normal control). The TAPSE (A) and the PVmax (B). Whole hearts were embedded in paraffinum, sliced into 5- $\mu$ m sections followed by HE staining, the right ventricular hypertrophy was measured (C). Sirius red (D) and AlexFluo-568 conjugated wheat germ agglutinin (E) staining were performed followed by examination with a light microscope (Nikon) were used to detect disorder of collagen deposition and myocardial fibrosis. Bar size were indicated in each picture. n=6-8 each group. The images are shown at 20 $\times$  and 40 $\times$  magnification. Bar size were indicated in each picture. \*p<0.05, \*\*p<0.01 vs rats injected with or wild-type siblings of Myadm knockout rats. #p<0.05, ##<0.01 vs wild-type rats that injected with MCT. n=6-8 per group.

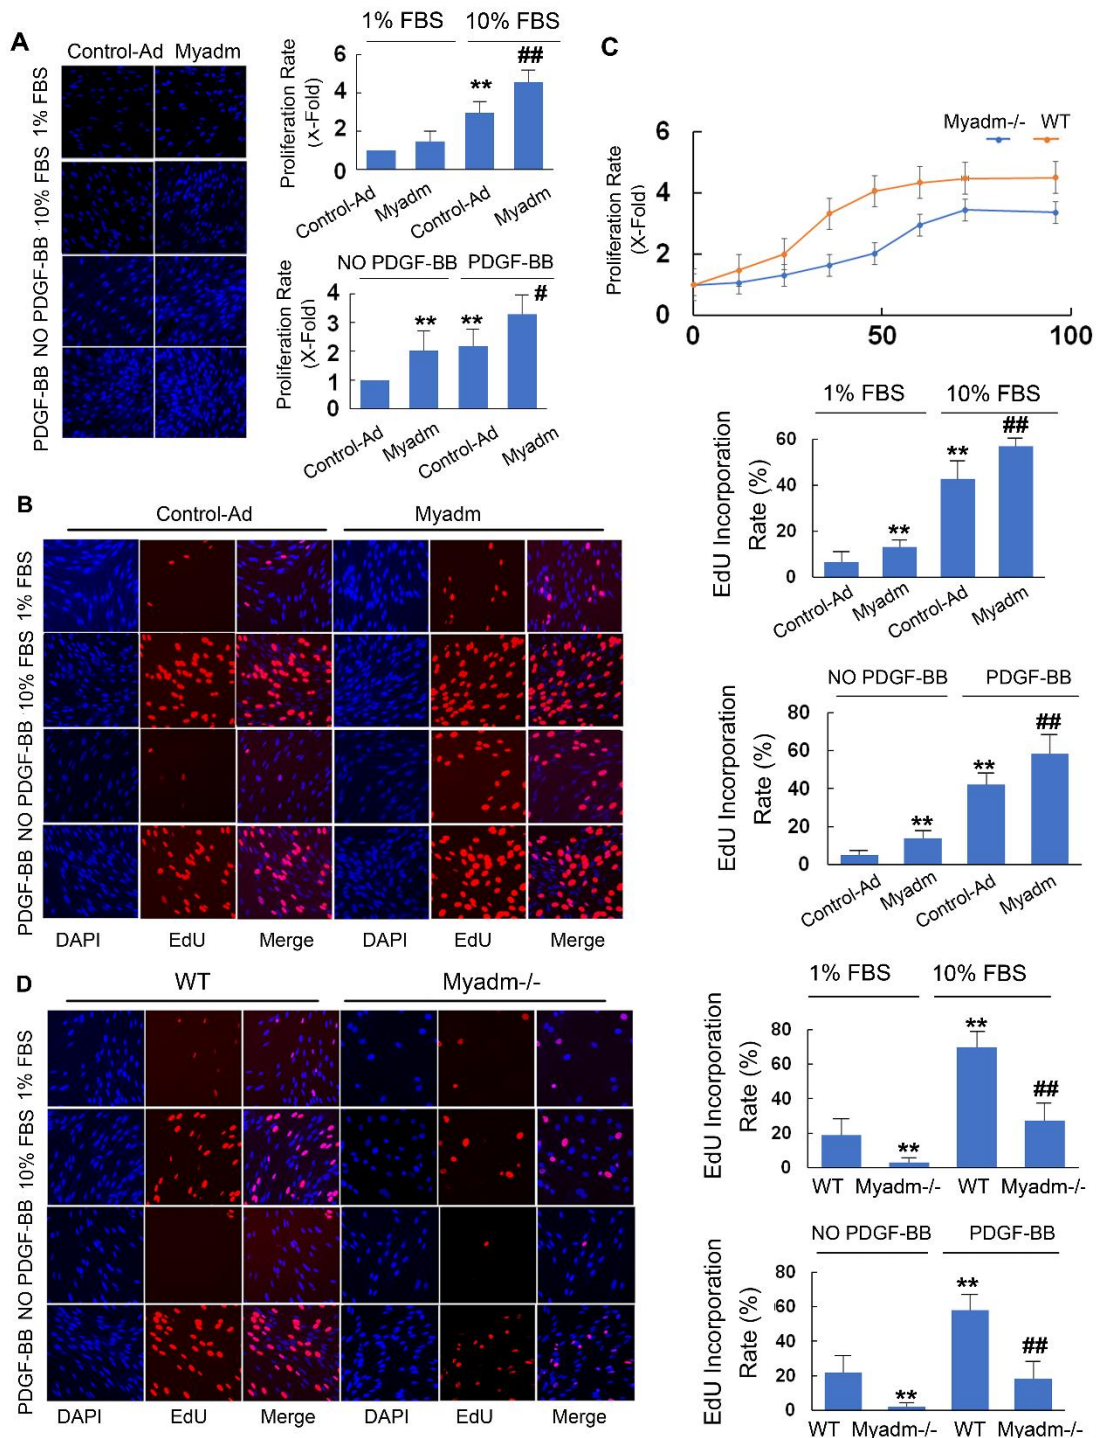

Figure S6. Myadm promotes PSMC proliferation. Quiescent rat PSMCs that overexpressed Myadm gene (Ad-Myadm) were then treated with stimulation with PDGF-BB (20 ng/mL) or the complete medium (10% FBS) for further 48 h. The cells were immediately fixed and permeabilized. A: the DAPI labeled cells were examined

using a Cellomics ArrayScan VTI HCS Reader. B: EdU incorporation assay was used to detect the DNA incorporation rate. Red fluorescent indicates the positive cells (DNA incorporation) and DAPI was employed to detect the nuclei. C: PSMCs isolated from the *Myadm*<sup>-/-</sup> rats were then treated with stimulation with PDGF-BB (20 ng/mL) or the complete medium (10% FBS) for further 48 h. CCK-8 staining was used according to the manufacturer guide to assess cell proliferation. D: EdU staining was determined according to the manufacturer's instructions. DAPI was employed to detect the nuclei. \* $p < 0.05$ , \*\* $p < 0.01$  vs PSMCs infected with control virus or PSMCs isolated from wild-type siblings of *Myadm* knockout rats. # $p < 0.05$ , ## $p < 0.01$  vs PSMCs infected with control virus or PSMCs isolated from wild-type rats and in response to 10% FBS or PDGF-BB at a concentration of 20ng/mL.  $n = 6-8$  in each group.



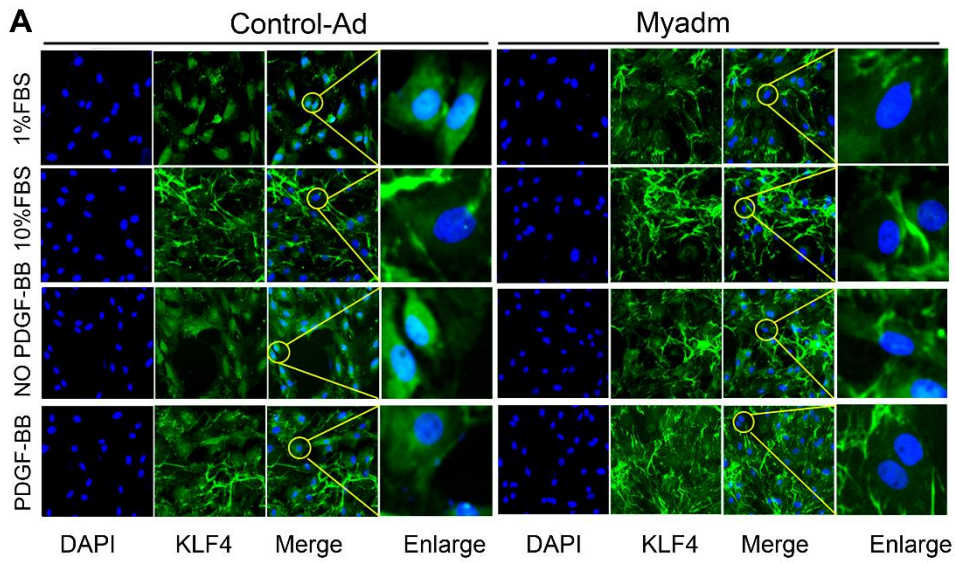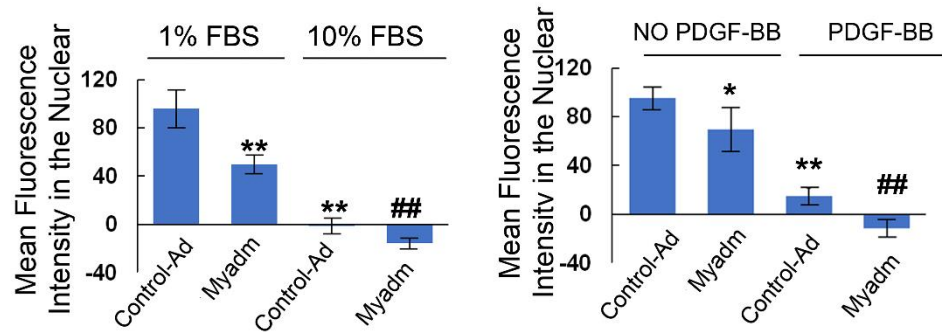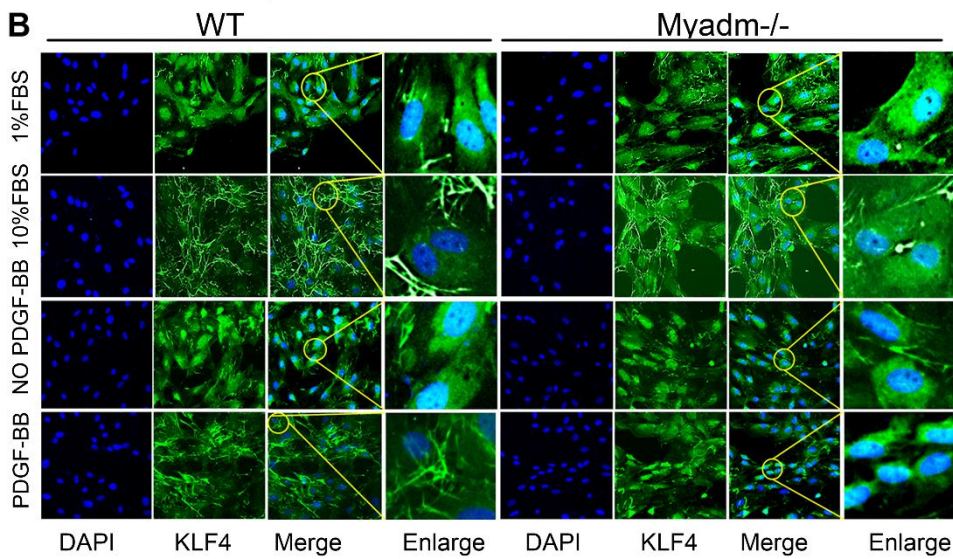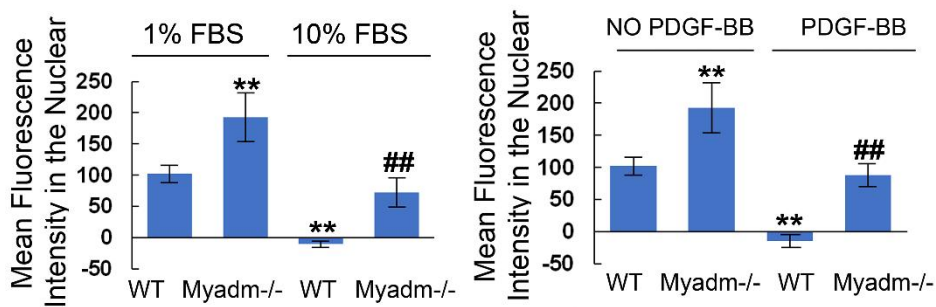

Figure S7. Myadm promotes PDGF-BB- and FBS-mediated KLF4 nuclear export. A: Quiescent rat PASMCs that overexpressed Myadm gene (Myadm) and B: PASMCs isolated from the MYADM<sup>-/-</sup> rats were then treated with stimulation with PDGF-BB (20 ng/mL) or complete medium (10% FBS) for further 48 h. KLF4 nuclear export was determined by the mean difference between nuclear and cytoplasmic immunocytofluorescence intensity. DAPI was employed to detect the nuclei. Data are expressed as X-fold induction compared to control. n=6-8 in each group. \*p<0.05, \*\*p<0.01 vs PASMCs infected with control virus or PASMCs isolated from wild-type siblings of Myadm knockout rats. #p<0.05, ##<0.01 vs PASMCs infected with control virus or PASMCs isolated from wild-type rats and in response to 10% FBS or PDGF-BB at a concentration of 20 ng/mL



Table S1. Differentially expressed proteins in the lungs of Myadm<sup>-/-</sup> rats compared to the control

| Accession  | Description                                                                                                           | Ratio(Myadm <sup>-/-</sup> /Myadm <sup>+/-</sup> ) | pValue   |
|------------|-----------------------------------------------------------------------------------------------------------------------|----------------------------------------------------|----------|
| D3ZIA7     | Anterior gradient 2 (Xenopus laevis) (Predicted), isoform CRA_a OS=Rattus norvegicus GN=Agr2 PE=4 SV=1 - [D3ZIA7_RAT] | 0.084649                                           | 1.42E-27 |
| Q9R1T1     | Barrier-to-autointegration factor OS=Rattus norvegicus GN=Banf1 PE=1 SV=1 - [BAF_RAT]                                 | 10.317708                                          | 7.93E-21 |
| Q05BA4     | Myadm protein OS=Rattus norvegicus GN=Myadm PE=1 SV=1 - [Q05BA4_RAT]                                                  | 0.144928                                           | 1.57E-17 |
| Q6IFV1     | Keratin, type I cytoskeletal 14 OS=Rattus norvegicus GN=Krt14 PE=2 SV=1 - [K1C14_RAT]                                 | 0.176887                                           | 2.01E-14 |
| A0JPN3     | BPI fold-containing family B member 1 OS=Rattus norvegicus GN=Bpifb1 PE=2 SV=1 - [BPIB1_RAT]                          | 0.184116                                           | 7.71E-14 |
| Q6IFV3     | Keratin, type I cytoskeletal 15 OS=Rattus norvegicus GN=Krt15 PE=1 SV=1 - [K1C15_RAT]                                 | 0.207422                                           | 3.52E-12 |
| F1LPK5     | Acidic mammalian chitinase OS=Rattus norvegicus GN=Chia PE=3 SV=3 - [F1LPK5_RAT]                                      | 0.219924                                           | 2.08E-11 |
| D3ZIA7     | Anterior gradient 2 (Xenopus laevis) (Predicted), isoform CRA_a OS=Rattus norvegicus GN=Agr2 PE=4 SV=1 - [D3ZIA7_RAT] | 4.962154                                           | 8.51E-11 |
| Q6P6Q2     | Keratin, type II cytoskeletal 5 OS=Rattus norvegicus GN=Krt5 PE=1 SV=1 - [K2C5_RAT]                                   | 0.233674                                           | 1.22E-10 |
| D3ZJW6     | RCG21066 OS=Rattus norvegicus GN=rCG_21066 PE=1 SV=1 - [D3ZJW6_RAT]                                                   | 0.23736                                            | 1.91E-10 |
| Q64315     | Cyclin dependent kinase inhibitor OS=Rattus norvegicus GN=Cdkn1a PE=1 SV=1 - [Q64315_RAT]                             | 4.804239                                           | 1.95E-10 |
| A0A0G2K4I8 | Uncharacterized protein OS=Rattus norvegicus PE=4 SV=1 - [A0A0G2K4I8_RAT]                                             | 0.249952                                           | 8.07E-10 |

|            |                                                                                                      |          |              |
|------------|------------------------------------------------------------------------------------------------------|----------|--------------|
| D3ZAU0     | Protein Muc5b OS=Rattus norvegicus<br>GN=Muc5b PE=4 SV=2 -<br>[D3ZAU0_RAT]                           | 0.251052 | 9.09E-1<br>0 |
| P11517     | Hemoglobin subunit beta-2 OS=Rattus<br>norvegicus PE=1 SV=2 -<br>[HBB2_RAT]                          | 0.254785 | 1.36E-0<br>9 |
| A0A0G2JXF0 | Uncharacterized protein OS=Rattus<br>norvegicus PE=1 SV=1 -<br>[A0A0G2JXF0_RAT]                      | 0.25561  | 1.48E-0<br>9 |
| Q6IFU8     | Keratin, type I cytoskeletal 17<br>OS=Rattus norvegicus GN=Krt17<br>PE=1 SV=1 - [K1C17_RAT]          | 0.257617 | 1.83E-0<br>9 |
| Q64232     | Very-long-chain enoyl-CoA reductase<br>OS=Rattus norvegicus GN=TeCr PE=1<br>SV=1 - [TECR_RAT]        | 0.263288 | 3.26E-0<br>9 |
| M0RA79     | Protein LOC691828 OS=Rattus<br>norvegicus GN=LOC691828 PE=1<br>SV=1 - [M0RA79_RAT]                   | 0.265426 | 4.03E-0<br>9 |
| F1LZ11     | Uncharacterized protein OS=Rattus<br>norvegicus PE=1 SV=1 -<br>[F1LZ11_RAT]                          | 0.271519 | 7.27E-0<br>9 |
| P01836     | Ig kappa chain C region, A allele<br>OS=Rattus norvegicus PE=1 SV=1 -<br>[KACA_RAT]                  | 0.272255 | 7.80E-0<br>9 |
| D3ZJW6     | RCG21066 OS=Rattus norvegicus<br>GN=rCG_21066 PE=1 SV=1 -<br>[D3ZJW6_RAT]                            | 4.066216 | 1.09E-0<br>8 |
| Q63011     | Zero beta-globin (Fragment)<br>OS=Rattus norvegicus PE=3 SV=1 -<br>[Q63011_RAT]                      | 0.278403 | 1.38E-0<br>8 |
| Q68A21     | Transcriptional activator protein<br>Pur-beta OS=Rattus norvegicus<br>GN=Purb PE=1 SV=3 - [PURB_RAT] | 0.279851 | 1.57E-0<br>8 |
| M0RD98     | Uncharacterized protein OS=Rattus<br>norvegicus PE=1 SV=2 -<br>[M0RD98_RAT]                          | 0.283356 | 2.15E-0<br>8 |
| D3ZFF8     | Uncharacterized protein OS=Rattus<br>norvegicus PE=1 SV=2 -<br>[D3ZFF8_RAT]                          | 0.290648 | 4.02E-0<br>8 |
| P01946     | Hemoglobin subunit alpha-1/2<br>OS=Rattus norvegicus GN=Hba1 PE=1<br>SV=3 - [HBA_RAT]                | 0.292526 | 4.71E-0<br>8 |
| B0K030     | DnaJ (Hsp40) homolog, subfamily B,<br>member 1 (Predicted), isoform CRA_b                            | 3.805471 | 4.79E-0<br>8 |

|            |                                                                                                                                                                     |          |          |
|------------|---------------------------------------------------------------------------------------------------------------------------------------------------------------------|----------|----------|
| O35543     | OS=Rattus norvegicus GN=Dnajb1<br>PE=1 SV=1 - [B0K030_RAT]<br>Hematopoietic prostaglandin D<br>synthase OS=Rattus norvegicus<br>GN=Hpgds PE=1 SV=3 -<br>[HPGDS_RAT] | 0.29323  | 4.99E-08 |
| P02091     | Hemoglobin subunit beta-1 OS=Rattus<br>norvegicus GN=Hbb PE=1 SV=3 -<br>[HBB1_RAT]                                                                                  | 0.293493 | 5.10E-08 |
| P12346     | Serotransferrin OS=Rattus norvegicus<br>GN=Tf PE=1 SV=3 - [TRFE_RAT]                                                                                                | 3.780362 | 5.54E-08 |
| A0A0G2JWX0 | Uncharacterized protein OS=Rattus<br>norvegicus PE=4 SV=1 -<br>[A0A0G2JWX0_RAT]                                                                                     | 0.297106 | 6.86E-08 |
| B0BNN3     | Carbonic anhydrase 1 OS=Rattus<br>norvegicus GN=Ca1 PE=1 SV=1 -<br>[CAH1_RAT]                                                                                       | 0.298765 | 7.84E-08 |
| A0A0G2QC22 | Protein RGD1306215 OS=Rattus<br>norvegicus GN=RGD1306215 PE=1<br>SV=1 - [A0A0G2QC22_RAT]                                                                            | 3.687822 | 9.44E-08 |
| P47967     | Galectin-5 OS=Rattus norvegicus<br>GN=Lgals5 PE=1 SV=2 -<br>[LEG5_RAT]                                                                                              | 0.302928 | 1.09E-07 |
| Q63377     | Sodium/potassium-transporting<br>ATPase subunit beta-3 OS=Rattus<br>norvegicus GN=Atp1b3 PE=2 SV=1 -<br>[AT1B3_RAT]                                                 | 3.630435 | 1.32E-07 |
| A0JPN3     | BPI fold-containing family B member<br>1 OS=Rattus norvegicus GN=Bpifb1<br>PE=2 SV=1 - [BPIB1_RAT]                                                                  | 3.602961 | 1.55E-07 |
| Q5VLR6     | BWK3 OS=Rattus norvegicus<br>GN=LOC366772 PE=2 SV=1 -<br>[Q5VLR6_RAT]                                                                                               | 0.311273 | 2.06E-07 |
| P07483     | Fatty acid-binding protein, heart<br>OS=Rattus norvegicus GN=Fabp3<br>PE=1 SV=2 - [FABPH_RAT]                                                                       | 3.365854 | 6.24E-07 |
| P20761     | Ig gamma-2B chain C region<br>OS=Rattus norvegicus GN=Igh-1a<br>PE=1 SV=1 - [IGG2B_RAT]                                                                             | 0.328794 | 7.14E-07 |
| P20767     | Ig lambda-2 chain C region OS=Rattus<br>norvegicus PE=4 SV=1 - [LAC2_RAT]                                                                                           | 0.329048 | 7.26E-07 |
| A0A0G2JX64 | Tropomyosin 1, alpha, isoform CRA_i<br>OS=Rattus norvegicus GN=Tpm1<br>PE=1 SV=1 - [A0A0G2JX64_RAT]                                                                 | 3.306122 | 8.90E-07 |

|            |                                                                                  |          |          |
|------------|----------------------------------------------------------------------------------|----------|----------|
| P16290     | Phosphoglycerate mutase 2 OS=Rattus norvegicus GN=Pgam2 PE=1 SV=2 - [PGAM2_RAT]  | 3.297342 | 9.37E-07 |
| F2Z3T4     | Muscleblind-like protein 2 OS=Rattus norvegicus GN=Mbnl2 PE=1 SV=1 - [MBNL2_RAT] | 3.252585 | 1.22E-06 |
| D3ZYE2     | Protein RGD1565617 OS=Rattus norvegicus GN=RGD1565617 PE=1 SV=3 - [D3ZYE2_RAT]   | 0.337505 | 1.27E-06 |
| D4AE31     | Protein Fam126a OS=Rattus norvegicus GN=Fam126a PE=1 SV=1 - [D4AE31_RAT]         | 0.342995 | 1.79E-06 |
| A0A0G2JSV6 | Protein Hba-a2 OS=Rattus norvegicus GN=Hba-a2 PE=1 SV=1 - [A0A0G2JSV6_RAT]       | 0.351506 | 3.01E-06 |
| Q4KM66     | LOC500183 protein OS=Rattus norvegicus GN=LOC500183 PE=1 SV=1 - [Q4KM66_RAT]     | 0.351572 | 3.02E-06 |
| D3ZAU0     | Protein Muc5b OS=Rattus norvegicus GN=Muc5b PE=4 SV=2 - [D3ZAU0_RAT]             | 3.100742 | 3.05E-06 |
| Q63041     | Alpha-1-macroglobulin OS=Rattus norvegicus GN=A1m PE=1 SV=1 - [A1M_RAT]          | 0.351759 | 3.05E-06 |
| F1M5L5     | Protein Igkv11-125 OS=Rattus norvegicus GN=Igkv11-125 PE=1 SV=2 - [F1M5L5_RAT]   | 0.352096 | 3.11E-06 |
| Q5M8A0     | Kng2 protein OS=Rattus norvegicus GN=Kng2 PE=2 SV=1 - [Q5M8A0_RAT]               | 0.353369 | 3.36E-06 |
| G3V7K1     | Myomesin 2 OS=Rattus norvegicus GN=Myom2 PE=1 SV=1 - [G3V7K1_RAT]                | 3.059783 | 3.91E-06 |
| A0A0G2K290 | Uncharacterized protein OS=Rattus norvegicus PE=4 SV=1 - [A0A0G2K290_RAT]        | 0.361724 | 5.43E-06 |
| P14141     | Carbonic anhydrase 3 OS=Rattus norvegicus GN=Ca3 PE=1 SV=3 - [CAH3_RAT]          | 2.951841 | 7.53E-06 |
| Q569B3     | Igh-6 protein OS=Rattus norvegicus GN=Igh-6 PE=2 SV=1 - [Q569B3_RAT]             | 0.368578 | 7.93E-06 |
| P04639     | Apolipoprotein A-I OS=Rattus norvegicus GN=Apoa1 PE=1 SV=2 -                     | 0.370637 | 8.87E-06 |

|            |                                                                                                            |          |          |
|------------|------------------------------------------------------------------------------------------------------------|----------|----------|
|            | [APOA1_RAT]                                                                                                |          |          |
| F1LXW4     | Protein Macc1 OS=Rattus norvegicus<br>GN=Macc1 PE=1 SV=2 -<br>[F1LXW4_RAT]                                 | 0.372594 | 9.84E-06 |
| Q6MG90     | Complement component 4, gene 2<br>OS=Rattus norvegicus GN=C4b PE=1<br>SV=1 - [Q6MG90_RAT]                  | 0.374622 | 1.10E-05 |
| D3ZCH9     | Protein Cd177 OS=Rattus norvegicus<br>GN=Cd177 PE=4 SV=2 -<br>[D3ZCH9_RAT]                                 | 0.376777 | 1.23E-05 |
| M0RBX3     | Uncharacterized protein OS=Rattus<br>norvegicus GN=Ighv1-9 PE=1 SV=2 -<br>[M0RBX3_RAT]                     | 0.377681 | 1.29E-05 |
| Q9EPH1     | Alpha-1B-glycoprotein OS=Rattus<br>norvegicus GN=A1bg PE=2 SV=2 -<br>[A1BG_RAT]                            | 0.379597 | 1.42E-05 |
| F1LYQ4     | Uncharacterized protein OS=Rattus<br>norvegicus GN=RGD1564515 PE=4<br>SV=2 - [F1LYQ4_RAT]                  | 0.382328 | 1.63E-05 |
| Q63011     | Zero beta-globin (Fragment)<br>OS=Rattus norvegicus PE=3 SV=1 -<br>[Q63011_RAT]                            | 2.821918 | 1.67E-05 |
| Q6P6G4     | 2,3-bisphosphoglycerate mutase<br>OS=Rattus norvegicus GN=Bpgm<br>PE=1 SV=1 - [Q6P6G4_RAT]                 | 0.389914 | 2.37E-05 |
| A0A0G2JX36 | Uncharacterized protein OS=Rattus<br>norvegicus PE=1 SV=1 -<br>[A0A0G2JX36_RAT]                            | 0.390165 | 2.40E-05 |
| A0A0A0MY22 | Sialate O-acetyltransferase OS=Rattus<br>norvegicus GN=Siae PE=1 SV=1 -<br>[A0A0A0MY22_RAT]                | 0.391154 | 2.52E-05 |
| A0A0G2JXU4 | Cytochrome P450 2A2 OS=Rattus<br>norvegicus GN=Cyp2a3 PE=3 SV=1 -<br>[A0A0G2JXU4_RAT]                      | 2.733813 | 2.86E-05 |
| Q9QX79     | Fetuin-B OS=Rattus norvegicus<br>GN=Fetub PE=2 SV=2 -<br>[FETUB_RAT]                                       | 0.394102 | 2.90E-05 |
| Q561R0     | Marginal zone B- and B1-cell-specific<br>protein OS=Rattus norvegicus<br>GN=Mzb1 PE=2 SV=1 -<br>[MZB1_RAT] | 0.395342 | 3.08E-05 |
| Q9EPH1     | Alpha-1B-glycoprotein OS=Rattus<br>norvegicus GN=A1bg PE=2 SV=2 -<br>[A1BG_RAT]                            | 2.72043  | 3.11E-05 |

|            |                                                                                                    |          |          |
|------------|----------------------------------------------------------------------------------------------------|----------|----------|
| Q5U329     | Anion exchange protein OS=Rattus norvegicus GN=Slc4a1 PE=1 SV=1 - [Q5U329_RAT]                     | 0.396301 | 3.22E-05 |
| F1LTY5     | Protein LOC100361009 OS=Rattus norvegicus GN=LOC100361052 PE=1 SV=3 - [F1LTY5_RAT]                 | 0.396417 | 3.24E-05 |
| A0A0H2UHQ8 | 40S ribosomal protein S17 OS=Rattus norvegicus GN=Rps17 PE=3 SV=1 - [A0A0H2UHQ8_RAT]               | 2.706831 | 3.38E-05 |
| G3V885     | Myosin-6 OS=Rattus norvegicus GN=Myh6 PE=1 SV=2 - [G3V885_RAT]                                     | 2.682111 | 3.94E-05 |
| D3ZBB2     | Uncharacterized protein OS=Rattus norvegicus PE=1 SV=3 - [D3ZBB2_RAT]                              | 0.400626 | 3.94E-05 |
| Q4G063     | Cysteine-rich with EGF-like domain protein 2 OS=Rattus norvegicus GN=Crel2 PE=1 SV=1 - [CREL2_RAT] | 0.401157 | 4.04E-05 |
| G3V6G1     | Immunoglobulin joining chain OS=Rattus norvegicus GN=Jchain PE=1 SV=1 - [G3V6G1_RAT]               | 0.40315  | 4.43E-05 |
| F1LUS1     | Uncharacterized protein OS=Rattus norvegicus PE=1 SV=2 - [F1LUS1_RAT]                              | 0.403854 | 4.57E-05 |
| Q4PP99     | Cardiac troponin C OS=Rattus norvegicus GN=Tnnc1 PE=1 SV=1 - [Q4PP99_RAT]                          | 2.602041 | 6.46E-05 |
| Q5PQU1     | Kininogen 1 OS=Rattus norvegicus GN=Kng1 PE=2 SV=1 - [Q5PQU1_RAT]                                  | 0.412084 | 6.59E-05 |
| F1M663     | Uncharacterized protein OS=Rattus norvegicus GN=Igkv5-37 PE=1 SV=2 - [F1M663_RAT]                  | 0.412394 | 6.67E-05 |
| Q6P734     | Plasma protease C1 inhibitor OS=Rattus norvegicus GN=Serp1 PE=2 SV=1 - [IC1_RAT]                   | 0.413139 | 6.89E-05 |
| P08649     | Complement C4 OS=Rattus norvegicus GN=C4 PE=1 SV=3 - [CO4_RAT]                                     | 0.415507 | 7.63E-05 |
| Q63910     | Alpha globin OS=Rattus norvegicus GN=Hba-a3 PE=1 SV=2 - [Q63910_RAT]                               | 0.415584 | 7.66E-05 |
| P08932     | T-kininogen 2 OS=Rattus norvegicus PE=1 SV=2 - [KNT2_RAT]                                          | 0.417367 | 8.26E-05 |



|            |                                                                                                                                   |          |          |
|------------|-----------------------------------------------------------------------------------------------------------------------------------|----------|----------|
| Q62669     | Protein Hbb-b1 OS=Rattus norvegicus<br>GN=LOC103694855 PE=1 SV=1 -<br>[Q62669_RAT]                                                | 0.42435  | 1.11E-04 |
| F1LZH0     | Protein LOC100912707 OS=Rattus<br>norvegicus GN=LOC100912707 PE=1<br>SV=2 - [F1LZH0_RAT]                                          | 0.424603 | 1.12E-04 |
| D3ZBS2     | Inter-alpha-trypsin inhibitor heavy<br>chain H3 OS=Rattus norvegicus<br>GN=Itih3 PE=1 SV=3 -<br>[D3ZBS2_RAT]                      | 0.426647 | 1.21E-04 |
| Q5VLR6     | BWK3 OS=Rattus norvegicus<br>GN=LOC366772 PE=2 SV=1 -<br>[Q5VLR6_RAT]                                                             | 2.461857 | 1.54E-04 |
| P17209     | Myosin light chain 4 OS=Rattus<br>norvegicus GN=Myl4 PE=2 SV=2 -<br>[MYL4_RAT]                                                    | 2.458268 | 1.57E-04 |
| F1M7K3     | Myosin, light polypeptide 7, regulatory<br>(Predicted), isoform CRA_a OS=Rattus<br>norvegicus GN=Myl7 PE=4 SV=2 -<br>[F1M7K3_RAT] | 0.433707 | 1.61E-04 |
| M0R789     | Uncharacterized protein OS=Rattus<br>norvegicus PE=4 SV=1 -<br>[M0R789_RAT]                                                       | 0.435193 | 1.70E-04 |
| O35820     | 2'-deoxynucleoside 5'-phosphate<br>N-hydrolase 1 OS=Rattus norvegicus<br>GN=Dnph1 PE=1 SV=1 -<br>[DNPH1_RAT]                      | 0.437923 | 1.89E-04 |
| P14046     | Alpha-1-inhibitor 3 OS=Rattus<br>norvegicus GN=A1i3 PE=1 SV=1 -<br>[A1I3_RAT]                                                     | 0.438875 | 1.96E-04 |
| A0A0G2K0N6 | Uncharacterized protein OS=Rattus<br>norvegicus PE=1 SV=1 -<br>[A0A0G2K0N6_RAT]                                                   | 0.439093 | 1.98E-04 |
| P02650     | Apolipoprotein E OS=Rattus<br>norvegicus GN=Apoe PE=1 SV=2 -<br>[APOE_RAT]                                                        | 0.441096 | 2.14E-04 |
| Q5BJZ2     | LOC367586 protein OS=Rattus<br>norvegicus GN=LOC367586 PE=1<br>SV=1 - [Q5BJZ2_RAT]                                                | 0.44298  | 2.29E-04 |
| A0A0G2JSJ1 | Tumor-associated calcium signal<br>transducer 2 OS=Rattus norvegicus<br>GN=Tacstd2 PE=4 SV=1 -<br>[A0A0G2JSJ1_RAT]                | 2.386525 | 2.46E-04 |
| Q9WUW3     | Complement factor I OS=Rattus                                                                                                     | 0.448625 | 2.83E-04 |

|            |                                                                                                                                       |          |          |
|------------|---------------------------------------------------------------------------------------------------------------------------------------|----------|----------|
|            | norvegicus GN=Cfi PE=2 SV=1 -<br>[CFAI_RAT]                                                                                           |          | 4        |
| Q03626     | Murinoglobulin-1 OS=Rattus<br>norvegicus GN=Mug1 PE=2 SV=1 -<br>[MUG1_RAT]                                                            | 0.45     | 2.97E-04 |
| Q6MG74     | B-factor, properdin OS=Rattus<br>norvegicus GN=Cfb PE=2 SV=1 -<br>[Q6MG74_RAT]                                                        | 0.450485 | 3.02E-04 |
| A0A0G2K684 | Protein Cr2 OS=Rattus norvegicus<br>GN=Cr2 PE=4 SV=1 -<br>[A0A0G2K684_RAT]                                                            | 2.347712 | 3.13E-04 |
| Q01129     | Decorin OS=Rattus norvegicus<br>GN=Dcn PE=1 SV=1 - [PGS2_RAT]                                                                         | 2.346241 | 3.16E-04 |
| A0A0G2JSH5 | Serum albumin OS=Rattus norvegicus<br>GN=Alb PE=1 SV=1 -<br>[A0A0G2JSH5_RAT]                                                          | 0.453737 | 3.40E-04 |
| P02651     | Apolipoprotein A-IV OS=Rattus<br>norvegicus GN=Apoa4 PE=1 SV=2 -<br>[APOA4_RAT]                                                       | 0.456764 | 3.78E-04 |
| G3V6D8     | Myosin-3 OS=Rattus norvegicus<br>GN=Myh3 PE=1 SV=1 -<br>[G3V6D8_RAT]                                                                  | 2.316759 | 3.79E-04 |
| F1LM19     | Alpha-2-HS-glycoprotein OS=Rattus<br>norvegicus GN=Ahsg PE=1 SV=3 -<br>[F1LM19_RAT]                                                   | 0.461235 | 4.42E-04 |
| D3ZAZ0     | Eukaryotic translation initiation factor<br>3 subunit M OS=Rattus norvegicus<br>GN=Eif3m PE=1 SV=1 -<br>[D3ZAZ0_RAT]                  | 2.272541 | 4.98E-04 |
| F1LWG8     | 5-hydroxytryptamine receptor 2B<br>OS=Rattus norvegicus GN=Srl PE=1<br>SV=3 - [F1LWG8_RAT]                                            | 2.272206 | 4.99E-04 |
| E9PT30     | Protein Itln1 OS=Rattus norvegicus<br>GN=Itln1 PE=4 SV=1 -<br>[E9PT30_RAT]                                                            | 2.265743 | 5.20E-04 |
| D3ZPI8     | Complement component 8, gamma<br>polypeptide (Predicted), isoform<br>CRA_a OS=Rattus norvegicus<br>GN=C8g PE=1 SV=1 -<br>[D3ZPI8_RAT] | 0.466207 | 5.23E-04 |
| A0A096P6L9 | Complement C5 OS=Rattus norvegicus<br>GN=C5 PE=1 SV=2 -<br>[A0A096P6L9_RAT]                                                           | 0.467391 | 5.44E-04 |
| D3ZQ30     | Protein Telo2 OS=Rattus norvegicus                                                                                                    | 0.471759 | 6.29E-04 |

|            |                                                                                                                  |          |          |
|------------|------------------------------------------------------------------------------------------------------------------|----------|----------|
|            | GN=Telo2 PE=1 SV=1 -<br>[D3ZQ30_RAT]                                                                             |          | 4        |
| A9YUA5     | Cardiac troponin T2 OS=Rattus<br>norvegicus GN=Tnnt2 PE=1 SV=1 -<br>[A9YUA5_RAT]                                 | 2.232836 | 6.37E-04 |
| P62332     | ADP-ribosylation factor 6 OS=Rattus<br>norvegicus GN=Arf6 PE=1 SV=2 -<br>[ARF6_RAT]                              | 2.218208 | 6.98E-04 |
| B1WCA2     | Tetratricopeptide repeat domain 25<br>OS=Rattus norvegicus GN=Ttc25<br>PE=2 SV=1 - [B1WCA2_RAT]                  | 2.214286 | 7.15E-04 |
| G3V6E7     | Fibromodulin OS=Rattus norvegicus<br>GN=Fmod PE=4 SV=1 -<br>[G3V6E7_RAT]                                         | 0.478503 | 7.81E-04 |
| Q5XIH1     | Asporin OS=Rattus norvegicus<br>GN=Aspn PE=1 SV=1 -<br>[Q5XIH1_RAT]                                              | 2.199    | 7.86E-04 |
| Q9ERM7     | Secretory carrier membrane protein 2<br>(Fragment) OS=Rattus norvegicus<br>GN=Scamp2 PE=2 SV=1 -<br>[Q9ERM7_RAT] | 0.479263 | 8.00E-04 |
| Q9ET61     | Complement component C1q receptor<br>OS=Rattus norvegicus GN=Cd93 PE=1<br>SV=1 - [C1QR1_RAT]                     | 2.191919 | 8.21E-04 |
| F1LTN6     | Protein Igkc OS=Rattus norvegicus<br>GN=Igkc PE=1 SV=2 -<br>[F1LTN6_RAT]                                         | 0.480358 | 8.28E-04 |
| P07483     | Fatty acid-binding protein, heart<br>OS=Rattus norvegicus GN=Fabp3<br>PE=1 SV=2 - [FABPH_RAT]                    | 0.48062  | 8.35E-04 |
| B5DFG2     | Hnrnp1 protein (Fragment) OS=Rattus<br>norvegicus GN=Hnrnp1 PE=2 SV=1 -<br>[B5DFG2_RAT]                          | 2.184965 | 8.57E-04 |
| Q04753     | Methylosome subunit pICln OS=Rattus<br>norvegicus GN=Clns1a PE=1 SV=1 -<br>[ICLN_RAT]                            | 0.481766 | 8.66E-04 |
| D4A4K4     | Protein Vps13c OS=Rattus norvegicus<br>GN=Vps13c PE=1 SV=2 -<br>[D4A4K4_RAT]                                     | 0.483019 | 9.00E-04 |
| A0A0G2JZ75 | Plasmalemma vesicle-associated<br>protein OS=Rattus norvegicus<br>GN=Plvap PE=4 SV=1 -<br>[A0A0G2JZ75_RAT]       | 2.176636 | 9.03E-04 |
| D3ZFC6     | Protein Itih4 OS=Rattus norvegicus                                                                               | 0.483592 | 9.16E-04 |

|            |                                                                                                   |          |          |
|------------|---------------------------------------------------------------------------------------------------|----------|----------|
|            | GN=Itih4 PE=1 SV=3 -<br>[D3ZFC6_RAT]                                                              |          | 4        |
| M0RBP7     | Uncharacterized protein OS=Rattus<br>norvegicus PE=4 SV=1 -<br>[M0RBP7_RAT]                       | 0.485987 | 9.86E-04 |
| D3ZFH5     | Protein Itih2 OS=Rattus norvegicus<br>GN=Itih2 PE=1 SV=3 -<br>[D3ZFH5_RAT]                        | 0.486034 | 9.88E-04 |
| P12346     | Serotransferrin OS=Rattus norvegicus<br>GN=Tf PE=1 SV=3 - [TRFE_RAT]                              | 0.486368 | 9.98E-04 |
| D3ZEP5     | Uncharacterized protein OS=Rattus<br>norvegicus PE=1 SV=3 -<br>[D3ZEP5_RAT]                       | 0.486486 | 1.00E-03 |
| F1LVL4     | Uncharacterized protein OS=Rattus<br>norvegicus PE=4 SV=2 -<br>[F1LVL4_RAT]                       | 0.487211 | 1.02E-03 |
| B3DMA1     | Atxn2l protein OS=Rattus norvegicus<br>GN=Atxn2l PE=1 SV=1 -<br>[B3DMA1_RAT]                      | 0.489614 | 1.10E-03 |
| A0A0G2JUY3 | Uncharacterized protein OS=Rattus<br>norvegicus PE=4 SV=1 -<br>[A0A0G2JUY3_RAT]                   | 0.491604 | 1.17E-03 |
| A0A0A0MXW3 | Histone H2A OS=Rattus norvegicus<br>GN=H2afz PE=3 SV=1 -<br>[A0A0A0MXW3_RAT]                      | 2.107171 | 1.39E-03 |
| D3Z9Z0     | Ankyrin 1, erythroid OS=Rattus<br>norvegicus GN=Ank1 PE=1 SV=1 -<br>[D3Z9Z0_RAT]                  | 0.499051 | 1.46E-03 |
| G3V709     | Nicotinate phosphoribosyltransferase<br>OS=Rattus norvegicus GN=Naprt<br>PE=1 SV=1 - [G3V709_RAT] | 0.499512 | 1.47E-03 |
| F1M9N5     | Ubiquitin conjugation factor E4 A<br>OS=Rattus norvegicus GN=Ube4a<br>PE=1 SV=1 - [F1M9N5_RAT]    | 0.499698 | 1.48E-03 |
| P14141     | Carbonic anhydrase 3 OS=Rattus<br>norvegicus GN=Ca3 PE=1 SV=3 -<br>[CAH3_RAT]                     | 0.503239 | 1.64E-03 |
| P70623     | Fatty acid-binding protein, adipocyte<br>OS=Rattus norvegicus GN=Fabp4<br>PE=1 SV=3 - [FABP4_RAT] | 0.503552 | 1.65E-03 |
| A9YUA5     | Cardiac troponin T2 OS=Rattus<br>norvegicus GN=Tnnt2 PE=1 SV=1 -<br>[A9YUA5_RAT]                  | 0.503458 | 1.65E-03 |
| Q62930     | Complement component C9 OS=Rattus                                                                 | 0.503671 | 1.66E-03 |

|            |                                                                                                               |          |          |
|------------|---------------------------------------------------------------------------------------------------------------|----------|----------|
|            | norvegicus GN=C9 PE=2 SV=1 -<br>[CO9_RAT]                                                                     |          | 3        |
| P23693     | Troponin I, cardiac muscle OS=Rattus<br>norvegicus GN=Tnni3 PE=1 SV=2 -<br>[TNNI3_RAT]                        | 2.075153 | 1.69E-03 |
| Q8VID1     | Dehydrogenase/reductase SDR family<br>member 4 OS=Rattus norvegicus<br>GN=Dhrs4 PE=2 SV=2 -<br>[DHRS4_RAT]    | 0.5053   | 1.74E-03 |
| F1LNH3     | Procollagen, type VI, alpha 2, isoform<br>CRA_a OS=Rattus norvegicus<br>GN=Col6a2 PE=1 SV=2 -<br>[F1LNH3_RAT] | 2.069196 | 1.75E-03 |
| M0RBJ7     | Complement C3 OS=Rattus norvegicus<br>GN=C3 PE=1 SV=1 - [M0RBJ7_RAT]                                          | 0.505855 | 1.77E-03 |
| Q3KR94     | Protein Vtn OS=Rattus norvegicus<br>GN=Vtn PE=1 SV=1 -<br>[Q3KR94_RAT]                                        | 0.506098 | 1.78E-03 |
| P04638     | Apolipoprotein A-II OS=Rattus<br>norvegicus GN=Apoa2 PE=2 SV=1 -<br>[APOA2_RAT]                               | 0.506962 | 1.82E-03 |
| D3ZVB7     | Osteoglycin (Predicted) OS=Rattus<br>norvegicus GN=Ogn PE=1 SV=1 -<br>[D3ZVB7_RAT]                            | 2.048193 | 1.99E-03 |
| Q66H86     | Olfactomedin-like protein 1 OS=Rattus<br>norvegicus GN=Olfm11 PE=2 SV=1 -<br>[OLFL1_RAT]                      | 2.045889 | 2.02E-03 |
| D3ZZC1     | Protein Txndc5 OS=Rattus norvegicus<br>GN=Txndc5 PE=1 SV=1 -<br>[D3ZZC1_RAT]                                  | 0.510743 | 2.02E-03 |
| P97569     | Kallistatin OS=Rattus norvegicus PE=2<br>SV=1 - [P97569_RAT]                                                  | 0.511945 | 2.09E-03 |
| Q68FQ4     | Uncharacterized protein C11orf70<br>homolog OS=Rattus norvegicus PE=2<br>SV=1 - [CK070_RAT]                   | 0.514365 | 2.23E-03 |
| A0A096MJZ2 | Protein Tbl2 OS=Rattus norvegicus<br>GN=Tbl2 PE=1 SV=1 -<br>[A0A096MJZ2_RAT]                                  | 0.514894 | 2.26E-03 |
| P20762     | Ig gamma-2C chain C region<br>OS=Rattus norvegicus PE=2 SV=1 -<br>[IGG2C_RAT]                                 | 0.516297 | 2.35E-03 |
| F1M3E9     | Uncharacterized protein OS=Rattus<br>norvegicus PE=4 SV=3 -<br>[F1M3E9_RAT]                                   | 0.516297 | 2.35E-03 |

|                |                                                                                                                                   |          |              |
|----------------|-----------------------------------------------------------------------------------------------------------------------------------|----------|--------------|
| Q66HD3         | Nuclear autoantigenic sperm protein<br>OS=Rattus norvegicus GN=Nasp PE=1<br>SV=1 - [NASP_RAT]                                     | 2.018809 | 2.38E-0<br>3 |
| A0A0G2JSP8     | Creatine kinase M-type OS=Rattus<br>norvegicus GN=Ckm PE=1 SV=1 -<br>[A0A0G2JSP8_RAT]                                             | 2.01671  | 2.42E-0<br>3 |
| Q68FY4         | Group specific component OS=Rattus<br>norvegicus GN=Gc PE=1 SV=1 -<br>[Q68FY4_RAT]                                                | 0.519303 | 2.54E-0<br>3 |
| E9PU10         | Protein Ifi47 OS=Rattus norvegicus<br>GN=Ifi47 PE=1 SV=3 -<br>[E9PU10_RAT]                                                        | 1.991525 | 2.82E-0<br>3 |
| Q91ZN1         | Coronin-1A OS=Rattus norvegicus<br>GN=Coro1a PE=1 SV=3 -<br>[COR1A_RAT]                                                           | 1.991013 | 2.83E-0<br>3 |
| P02764         | Alpha-1-acid glycoprotein OS=Rattus<br>norvegicus GN=Orm1 PE=2 SV=1 -<br>[A1AG_RAT]                                               | 0.52381  | 2.86E-0<br>3 |
| P31211         | Corticosteroid-binding globulin<br>OS=Rattus norvegicus GN=Serpina6<br>PE=1 SV=2 - [CBG_RAT]                                      | 0.525435 | 2.99E-0<br>3 |
| A0A0G2K896     | Protein RGD1310507 OS=Rattus<br>norvegicus GN=RGD1310507 PE=1<br>SV=1 - [A0A0G2K896_RAT]                                          | 0.526439 | 3.06E-0<br>3 |
| A0A0H2UHI<br>5 | Protein LOC299282 OS=Rattus<br>norvegicus GN=Serpina3n PE=1 SV=1<br>- [A0A0H2UHI5_RAT]                                            | 0.526596 | 3.08E-0<br>3 |
| F1M7K3         | Myosin, light polypeptide 7, regulatory<br>(Predicted), isoform CRA_a OS=Rattus<br>norvegicus GN=Myl7 PE=4 SV=2 -<br>[F1M7K3_RAT] | 1.968047 | 3.25E-0<br>3 |
| Q5U2U7         | mRNA cap guanine-N7<br>methyltransferase OS=Rattus<br>norvegicus GN=Rnmt PE=1 SV=1 -<br>[MCES_RAT]                                | 1.955631 | 3.51E-0<br>3 |
| P17209         | Myosin light chain 4 OS=Rattus<br>norvegicus GN=Myl4 PE=2 SV=2 -<br>[MYL4_RAT]                                                    | 0.533447 | 3.65E-0<br>3 |
| A0A0G2JSJ8     | Fucosidase, alpha-L-1, tissue, isoform<br>CRA_a OS=Rattus norvegicus<br>GN=Fuca1 PE=1 SV=1 -<br>[A0A0G2JSJ8_RAT]                  | 0.536252 | 3.91E-0<br>3 |
| Q6RUV5         | Ras-related C3 botulinum toxin<br>substrate 1 OS=Rattus norvegicus                                                                | 1.935811 | 3.95E-0<br>3 |



|        |                                                                            |          |              |
|--------|----------------------------------------------------------------------------|----------|--------------|
|        | GN=Rac1 PE=1 SV=1 - [RAC1_RAT]                                             |          |              |
|        | Dynein light chain roadblock-type 2                                        |          |              |
| D4A0A0 | (Predicted) OS=Rattus norvegicus<br>GN=Dynlrb2 PE=4 SV=1 -<br>[D4A0A0_RAT] | 0.539615 | 4.25E-0<br>3 |
|        | Cytoplasmic dynein 2 heavy chain 1                                         |          |              |
| D3ZBB8 | OS=Rattus norvegicus GN=Dync2h1<br>PE=4 SV=3 - [D3ZBB8_RAT]                | 0.540074 | 4.29E-0<br>3 |
|        | Beta-hexosaminidase subunit beta                                           |          |              |
| Q6AXR4 | OS=Rattus norvegicus GN=Hexb PE=2<br>SV=1 - [HEXB_RAT]                     | 0.540416 | 4.33E-0<br>3 |
|        | Fibp protein OS=Rattus norvegicus                                          |          |              |
| Q6P775 | GN=Fibp PE=1 SV=1 -<br>[Q6P775_RAT]                                        | 1.917722 | 4.41E-0<br>3 |
|        | Protein Stag1 OS=Rattus norvegicus                                         |          |              |
| D4A3Q2 | GN=Stag1 PE=1 SV=1 -<br>[D4A3Q2_RAT]                                       | 1.911894 | 4.57E-0<br>3 |
|        | Protein Pi16 OS=Rattus norvegicus                                          |          |              |
| D3ZGM7 | GN=Pi16 PE=1 SV=2 -<br>[D3ZGM7_RAT]                                        | 1.911304 | 4.59E-0<br>3 |
|        | Biliverdin reductase A OS=Rattus<br>norvegicus GN=Blvra PE=1 SV=1 -        |          |              |
| P46844 | [BIEA_RAT]                                                                 | 1.909497 | 4.64E-0<br>3 |
|        | Protein Igkv4-86 OS=Rattus<br>norvegicus GN=Igkv4-86 PE=1 SV=2             |          |              |
| M0RBK4 | - [M0RBK4_RAT]                                                             | 0.543662 | 4.68E-0<br>3 |
|        | Cyhr1 protein OS=Rattus norvegicus                                         |          |              |
| B5DEK6 | GN=Cyhr1 PE=1 SV=1 -<br>[B5DEK6_RAT]                                       | 0.544948 | 4.82E-0<br>3 |
|        | Protein Mms19 OS=Rattus norvegicus                                         |          |              |
| M0R6T4 | GN=Mms19 PE=1 SV=1 -<br>[M0R6T4_RAT]                                       | 0.545198 | 4.85E-0<br>3 |
|        | Cfh protein OS=Rattus norvegicus                                           |          |              |
| Q5XJW6 | GN=Cfh PE=1 SV=1 -<br>[Q5XJW6_RAT]                                         | 0.545455 | 4.88E-0<br>3 |
|        | Fibrinogen beta chain OS=Rattus<br>norvegicus GN=Fgb PE=1 SV=4 -           |          |              |
| P14480 | [FIBB_RAT]                                                                 | 0.545455 | 4.88E-0<br>3 |
|        | Tropomyosin alpha-1 chain OS=Rattus<br>norvegicus GN=Tpm1 PE=1 SV=3 -      |          |              |
| P04692 | [TPM1_RAT]                                                                 | 0.546737 | 5.03E-0<br>3 |
|        | Prostaglandin E synthase 3 OS=Rattus<br>norvegicus GN=Ptges3 PE=1 SV=2 -   |          |              |
| P83868 | [TEBP_RAT]                                                                 | 1.895349 | 5.05E-0<br>3 |

|        |                                                                                                                               |          |              |
|--------|-------------------------------------------------------------------------------------------------------------------------------|----------|--------------|
| Q794E4 | Heterogeneous nuclear<br>ribonucleoprotein F OS=Rattus<br>norvegicus GN=Hnrmpf PE=1 SV=3 -<br>[HNRPF_RAT]                     | 1.893037 | 5.12E-0<br>3 |
| Q5RJQ4 | NAD-dependent protein deacetylase<br>sirtuin-2 OS=Rattus norvegicus<br>GN=Sirt2 PE=1 SV=1 - [SIR2_RAT]                        | 0.547561 | 5.13E-0<br>3 |
| P62275 | 40S ribosomal protein S29 OS=Rattus<br>norvegicus GN=Rps29 PE=1 SV=2 -<br>[RS29_RAT]                                          | 1.887244 | 5.31E-0<br>3 |
| D4A9W3 | Protein RGD1311756 OS=Rattus<br>norvegicus GN=RGD1311756 PE=1<br>SV=1 - [D4A9W3_RAT]                                          | 0.549763 | 5.40E-0<br>3 |
| B1PLB2 | CD34 antigen isoform 2 OS=Rattus<br>norvegicus GN=Cd34 PE=2 SV=1 -<br>[B1PLB2_RAT]                                            | 1.883844 | 5.42E-0<br>3 |
| Q01177 | Plasminogen OS=Rattus norvegicus<br>GN=Plg PE=2 SV=2 - [PLMN_RAT]                                                             | 0.550349 | 5.47E-0<br>3 |
| F1LYQ8 | FERM, RhoGEF and pleckstrin<br>domain-containing protein 1<br>OS=Rattus norvegicus GN=Farp1<br>PE=1 SV=2 - [FARP1_RAT]        | 0.551351 | 5.60E-0<br>3 |
| D3ZN95 | Protein Hcfc1 OS=Rattus norvegicus<br>GN=Hcfc1 PE=1 SV=1 -<br>[D3ZN95_RAT]                                                    | 1.874494 | 5.73E-0<br>3 |
| Q5U2T5 | Protein Stard3 OS=Rattus norvegicus<br>GN=Stard3 PE=1 SV=1 -<br>[Q5U2T5_RAT]                                                  | 0.55249  | 5.74E-0<br>3 |
| Q5XIM5 | Protein CDV3 homolog OS=Rattus<br>norvegicus GN=Cdv3 PE=1 SV=1 -<br>[CDV3_RAT]                                                | 1.873896 | 5.75E-0<br>3 |
| Q6AYT5 | Protein-glutamate O-methyltransferase<br>OS=Rattus norvegicus GN=Armt1<br>PE=1 SV=1 - [ARMT1_RAT]                             | 1.872754 | 5.79E-0<br>3 |
| P07895 | Superoxide dismutase [Mn],<br>mitochondrial OS=Rattus norvegicus<br>GN=Sod2 PE=1 SV=2 -<br>[SODM_RAT]                         | 1.871002 | 5.85E-0<br>3 |
| Q9EST6 | Acidic leucine-rich nuclear<br>phosphoprotein 32 family member B<br>OS=Rattus norvegicus GN=Anp32b<br>PE=1 SV=1 - [AN32B_RAT] | 1.868395 | 5.94E-0<br>3 |
| G3V8D4 | Apolipoprotein C-II (Predicted)<br>OS=Rattus norvegicus GN=Apoc2                                                              | 0.554096 | 5.96E-0<br>3 |

|            |                                                                                                                                         |          |          |
|------------|-----------------------------------------------------------------------------------------------------------------------------------------|----------|----------|
| Q5XIA5     | PE=1 SV=1 - [G3V8D4_RAT]<br>Coenzyme A synthase OS=Rattus<br>norvegicus GN=Coasy PE=1 SV=1 -<br>[Q5XIA5_RAT]                            | 0.555247 | 6.11E-03 |
| P42123     | L-lactate dehydrogenase B chain<br>OS=Rattus norvegicus GN=Ldhb PE=1<br>SV=2 - [LDHB_RAT]                                               | 1.86236  | 6.16E-03 |
| D4A5L9     | Protein LOC679794 OS=Rattus<br>norvegicus GN=LOC679794 PE=3<br>SV=1 - [D4A5L9_RAT]                                                      | 1.854305 | 6.47E-03 |
| A0A0G2K9Y5 | Histidine-rich glycoprotein OS=Rattus<br>norvegicus GN=Hrg PE=1 SV=1 -<br>[A0A0G2K9Y5_RAT]                                              | 0.557845 | 6.48E-03 |
| A0A096MKD4 | Protein Ldb3 OS=Rattus norvegicus<br>GN=Ldb3 PE=1 SV=1 -<br>[A0A096MKD4_RAT]                                                            | 0.55819  | 6.53E-03 |
| Q63468     | Phosphoribosyl pyrophosphate<br>synthase-associated protein 1<br>OS=Rattus norvegicus GN=Prpsap1<br>PE=1 SV=1 - [KPRA_RAT]              | 0.558424 | 6.56E-03 |
| Q6AYT7     | Monoacylglycerol lipase ABHD12<br>OS=Rattus norvegicus GN=Abhd12<br>PE=2 SV=1 - [ABD12_RAT]                                             | 0.559211 | 6.68E-03 |
| B2RYM3     | Inter-alpha trypsin inhibitor, heavy<br>chain 1 (Predicted), isoform CRA_a<br>OS=Rattus norvegicus GN=Itih1 PE=1<br>SV=1 - [B2RYM3_RAT] | 0.55942  | 6.71E-03 |
| D3ZR64     | Protein Zfp598 OS=Rattus norvegicus<br>GN=Zfp598 PE=1 SV=2 -<br>[D3ZR64_RAT]                                                            | 0.560088 | 6.81E-03 |
| P41562     | Isocitrate dehydrogenase [NADP]<br>cytoplasmic OS=Rattus norvegicus<br>GN=Idh1 PE=1 SV=1 - [IDHC_RAT]                                   | 1.841751 | 6.98E-03 |
| A0A0G2JY31 | Alpha-1-antiproteinase OS=Rattus<br>norvegicus GN=Serpina1 PE=1 SV=1 -<br>[A0A0G2JY31_RAT]                                              | 0.56124  | 6.98E-03 |
| O35520     | 5I2 antigen (Fragment) OS=Rattus<br>norvegicus GN=Cr11 PE=2 SV=1 -<br>[O35520_RAT]                                                      | 1.835443 | 7.24E-03 |
| Q8CFN2     | Cell division control protein 42<br>homolog OS=Rattus norvegicus<br>GN=Cdc42 PE=1 SV=2 -<br>[CDC42_RAT]                                 | 1.834208 | 7.30E-03 |
| A0A0A0MY0  | Endoplasmin OS=Rattus norvegicus                                                                                                        | 0.564589 | 7.51E-03 |

|        |                                                                                                                                  |          |          |
|--------|----------------------------------------------------------------------------------------------------------------------------------|----------|----------|
| 9      | GN=Hsp90b1 PE=1 SV=1 -<br>[A0A0A0MY09_RAT]                                                                                       |          | 3        |
| P02767 | Transthyretin OS=Rattus norvegicus<br>GN=Ttr PE=1 SV=1 - [TTHY_RAT]                                                              | 0.564617 | 7.52E-03 |
| Q641X3 | Beta-hexosaminidase subunit alpha<br>OS=Rattus norvegicus GN=Hexa PE=2<br>SV=1 - [HEXA_RAT]                                      | 0.565345 | 7.64E-03 |
| Q08290 | Calponin-1 OS=Rattus norvegicus<br>GN=Cnn1 PE=1 SV=1 - [CNN1_RAT]<br>Protein                                                     | 1.825994 | 7.67E-03 |
| Q04631 | farnesyltransferase/geranylgeranyltrans<br>ferase type-1 subunit alpha OS=Rattus<br>norvegicus GN=Fnta PE=1 SV=1 -<br>[FNTA_RAT] | 0.566194 | 7.78E-03 |
| Q63118 | Calcitonin gene-related peptide type 1<br>receptor OS=Rattus norvegicus<br>GN=Calcr1 PE=2 SV=1 -<br>[CALRL_RAT]                  | 1.819136 | 7.99E-03 |
| Q4V7D1 | Signal sequence receptor, alpha<br>OS=Rattus norvegicus GN=Ssr1 PE=1<br>SV=1 - [Q4V7D1_RAT]                                      | 0.569787 | 8.39E-03 |
| Q3MHS7 | GDP-mannose 4, 6-dehydratase<br>OS=Rattus norvegicus GN=Gmds<br>PE=2 SV=1 - [Q3MHS7_RAT]                                         | 0.571804 | 8.76E-03 |
| B5DF79 | Rnaset2 protein OS=Rattus norvegicus<br>GN=Rnaset2 PE=2 SV=1 -<br>[B5DF79_RAT]                                                   | 0.572442 | 8.88E-03 |
| B0BNC0 | Ckmt2 protein OS=Rattus norvegicus<br>GN=Ckmt2 PE=2 SV=1 -<br>[B0BNC0_RAT]                                                       | 0.57304  | 8.99E-03 |
| D4ACV3 | Histone H2A OS=Rattus norvegicus<br>GN=Hist2h2ac PE=3 SV=2 -<br>[D4ACV3_RAT]                                                     | 1.792103 | 9.38E-03 |
| P30152 | Neutrophil gelatinase-associated<br>lipocalin OS=Rattus norvegicus<br>GN=Lcn2 PE=1 SV=2 - [NGAL_RAT]                             | 1.786145 | 9.72E-03 |
| P47820 | Angiotensin-converting enzyme<br>OS=Rattus norvegicus GN=Ace PE=1<br>SV=1 - [ACE_RAT]                                            | 1.784716 | 9.80E-03 |
| P29419 | ATP synthase subunit e, mitochondrial<br>OS=Rattus norvegicus GN=Atp5i<br>PE=1 SV=3 - [ATP5I_RAT]                                | 1.777886 | 1.02E-02 |
| O08651 | D-3-phosphoglycerate dehydrogenase<br>OS=Rattus norvegicus GN=Phgdh                                                              | 0.578984 | 1.02E-02 |

|                |                                                                                                               |          |              |
|----------------|---------------------------------------------------------------------------------------------------------------|----------|--------------|
| F1LQQ8         | PE=1 SV=3 - [SERA_RAT]<br>Beta-glucuronidase OS=Rattus<br>norvegicus GN=Gusb PE=1 SV=2 -<br>[F1LQQ8_RAT]      | 0.580196 | 1.04E-0<br>2 |
| G3V6E7         | Fibromodulin OS=Rattus norvegicus<br>GN=Fmod PE=4 SV=1 -<br>[G3V6E7_RAT]                                      | 1.772727 | 1.05E-0<br>2 |
| P02680         | Fibrinogen gamma chain OS=Rattus<br>norvegicus GN=Fgg PE=1 SV=3 -<br>[FIBG_RAT]                               | 0.580542 | 1.05E-0<br>2 |
| Q2XTA8         | NADH dehydrogenase 1 beta 4<br>(Fragment) OS=Rattus norvegicus<br>GN=Ndufb4 PE=2 SV=1 -<br>[Q2XTA8_RAT]       | 0.580558 | 1.05E-0<br>2 |
| Q5D005         | alpha-1,2-Mannosidase (Fragment)<br>OS=Rattus norvegicus GN=Man1a1<br>PE=2 SV=1 - [Q5D005_RAT]                | 0.581315 | 1.06E-0<br>2 |
| Q5U3Z7         | Serine hydroxymethyltransferase<br>OS=Rattus norvegicus GN=Shmt2<br>PE=1 SV=1 - [Q5U3Z7_RAT]                  | 0.581505 | 1.07E-0<br>2 |
| F1M589         | Protein Pml OS=Rattus norvegicus<br>GN=Pml PE=1 SV=3 -<br>[F1M589_RAT]                                        | 1.767651 | 1.08E-0<br>2 |
| B1H282         | Glycosyltransferase 25 domain<br>containing 1 OS=Rattus norvegicus<br>GN=Colgalt1 PE=1 SV=1 -<br>[B1H282_RAT] | 0.582386 | 1.09E-0<br>2 |
| D4A2F6         | Protein Nhlrc3 OS=Rattus norvegicus<br>GN=Nhlrc3 PE=1 SV=2 -<br>[D4A2F6_RAT]                                  | 0.582996 | 1.10E-0<br>2 |
| P23928         | Alpha-crystallin B chain OS=Rattus<br>norvegicus GN=Cryab PE=1 SV=1 -<br>[CRYAB_RAT]                          | 1.763411 | 1.11E-0<br>2 |
| B5DFK8         | Pdxdc1 protein OS=Rattus norvegicus<br>GN=Pdxdc1 PE=2 SV=1 -<br>[B5DFK8_RAT]                                  | 0.583573 | 1.11E-0<br>2 |
| P20059         | Hemopexin OS=Rattus norvegicus<br>GN=Hpx PE=1 SV=3 - [HEMO_RAT]                                               | 0.584256 | 1.13E-0<br>2 |
| Q6AYD5         | G1 to S phase transition 1 OS=Rattus<br>norvegicus GN=Gsp1 PE=1 SV=1 -<br>[Q6AYD5_RAT]                        | 0.586047 | 1.17E-0<br>2 |
| A0A0G2K2D<br>9 | Uncharacterized protein OS=Rattus<br>norvegicus PE=1 SV=1 -<br>[A0A0G2K2D9_RAT]                               | 0.58596  | 1.17E-0<br>2 |

|            |                                                                                                                |          |          |
|------------|----------------------------------------------------------------------------------------------------------------|----------|----------|
| Q3KRE2     | Methyltransferase like 7A OS=Rattus norvegicus GN=Mettl7a PE=1 SV=1 - [Q3KRE2_RAT]                             | 1.74583  | 1.23E-02 |
| P06757     | Alcohol dehydrogenase 1 OS=Rattus norvegicus GN=Adh1 PE=1 SV=3 - [ADH1_RAT]                                    | 0.58866  | 1.23E-02 |
| D3ZZT9     | Protein Col14a1 OS=Rattus norvegicus GN=Col14a1 PE=1 SV=3 - [D3ZZT9_RAT]                                       | 0.591195 | 1.29E-02 |
| P50393     | Cytosolic phospholipase A2 OS=Rattus norvegicus GN=Pla2g4a PE=1 SV=1 - [PA24A_RAT]                             | 0.591813 | 1.31E-02 |
| P01015     | Angiotensinogen OS=Rattus norvegicus GN=Agt PE=1 SV=1 - [ANGT_RAT]                                             | 0.592145 | 1.32E-02 |
| D4A678     | Protein Spta1 OS=Rattus norvegicus GN=Spta1 PE=1 SV=3 - [D4A678_RAT]                                           | 0.592807 | 1.33E-02 |
| A0A0G2K7X0 | Protein LOC100909983 OS=Rattus norvegicus GN=LOC100909983 PE=4 SV=1 - [A0A0G2K7X0_RAT]                         | 1.729934 | 1.35E-02 |
| G3V8L1     | PYD and CARD domain containing OS=Rattus norvegicus GN=Pycard PE=1 SV=1 - [G3V8L1_RAT]                         | 0.593935 | 1.36E-02 |
| A0A0G2JT00 | Divalent cation tolerant protein CUTA, isoform CRA_c OS=Rattus norvegicus GN=Cuta PE=1 SV=1 - [A0A0G2JT00_RAT] | 0.594286 | 1.37E-02 |
| A0A0G2K6H2 | Maleylacetoacetate isomerase OS=Rattus norvegicus GN=Gstz1 PE=1 SV=1 - [A0A0G2K6H2_RAT]                        | 0.595092 | 1.39E-02 |
| A0A096MJW5 | Phosphoinositide phospholipase C OS=Rattus norvegicus GN=Plch1 PE=4 SV=1 - [A0A096MJW5_RAT]                    | 0.595209 | 1.40E-02 |
| D3ZWD6     | Complement component 8, alpha polypeptide (Predicted) OS=Rattus norvegicus GN=C8a PE=1 SV=1 - [D3ZWD6_RAT]     | 0.595388 | 1.40E-02 |
| Q5PPN5     | Tubulin polymerization-promoting protein family member 3 OS=Rattus norvegicus GN=Tppp3 PE=2 SV=1 - [TPPP3_RAT] | 1.717268 | 1.46E-02 |
| B0BNI5     | Olfactomedin-like protein 3 OS=Rattus norvegicus GN=Olfml3 PE=2 SV=2 -                                         | 1.716004 | 1.47E-02 |



|            |                                                                                                                          |          |          |
|------------|--------------------------------------------------------------------------------------------------------------------------|----------|----------|
| A0A0G2JYK0 | [OLFL3_RAT]<br>Protein LOC299282 OS=Rattus norvegicus GN=LOC299282 PE=1 SV=1 - [A0A0G2JYK0_RAT]<br>Heterogeneous nuclear | 0.599165 | 1.50E-02 |
| G3V9Q3     | ribonucleoprotein H OS=Rattus norvegicus GN=Hnrmph1 PE=1 SV=2 - [G3V9Q3_RAT]                                             | 1.711066 | 1.51E-02 |
| Q9QZ76     | Myoglobin OS=Rattus norvegicus GN=Mb PE=1 SV=3 - [MYG_RAT]                                                               | 0.599879 | 1.52E-02 |
| P62329     | Thymosin beta-4 OS=Rattus norvegicus GN=Tmsb4x PE=1 SV=2 - [TYB4_RAT]                                                    | 1.708817 | 1.53E-02 |
| B0BND9     | Protein Srp72 OS=Rattus norvegicus GN=Srp72 PE=1 SV=1 - [B0BND9_RAT]                                                     | 1.707707 | 1.54E-02 |
| G3V878     | Signal peptidase complex catalytic subunit SEC11 OS=Rattus norvegicus GN=Sec11c PE=1 SV=1 - [G3V878_RAT]                 | 0.601643 | 1.57E-02 |
| P23693     | Troponin I, cardiac muscle OS=Rattus norvegicus GN=Tnni3 PE=1 SV=2 - [TNNI3_RAT]                                         | 0.601634 | 1.57E-02 |
| P63045     | Vesicle-associated membrane protein 2 OS=Rattus norvegicus GN=Vamp2 PE=1 SV=2 - [VAMP2_RAT]                              | 0.601966 | 1.58E-02 |
| Q9R1T3     | Cathepsin Z OS=Rattus norvegicus GN=Ctsz PE=1 SV=2 - [CATZ_RAT]                                                          | 0.602557 | 1.60E-02 |
| Q5BJP7     | Afm protein (Fragment) OS=Rattus norvegicus GN=Afm PE=2 SV=1 - [Q5BJP7_RAT]                                              | 0.602564 | 1.60E-02 |
| D4A7J8     | PRP4 pre-mRNA processing factor 4 homolog (Yeast) OS=Rattus norvegicus GN=Prpf4 PE=1 SV=1 - [D4A7J8_RAT]                 | 1.700104 | 1.61E-02 |
| Q01579     | Glutathione S-transferase theta-1 OS=Rattus norvegicus GN=Gstt1 PE=1 SV=2 - [GSTT1_RAT]                                  | 1.69891  | 1.62E-02 |
| A7LNF8     | MHC class I antigen (Fragment) OS=Rattus norvegicus GN=RT1.A PE=2 SV=1 - [A7LNF8_RAT]                                    | 1.69781  | 1.63E-02 |
| D4A5S9     | Protein Prpf39 OS=Rattus norvegicus GN=Prpf39 PE=1 SV=1 - [D4A5S9_RAT]                                                   | 0.603604 | 1.63E-02 |

|        |                                                                                                                                      |          |          |
|--------|--------------------------------------------------------------------------------------------------------------------------------------|----------|----------|
| Q5EBD4 | Dcps protein (Fragment) OS=Rattus norvegicus GN=Dcps PE=2 SV=1 - [Q5EBD4_RAT]                                                        | 1.697674 | 1.64E-02 |
| Q5U1Y2 | Protein Rac2 OS=Rattus norvegicus GN=Rac2 PE=1 SV=1 - [Q5U1Y2_RAT]                                                                   | 1.695351 | 1.66E-02 |
| B5DEH4 | Protein Uap111 OS=Rattus norvegicus GN=Uap111 PE=1 SV=1 - [B5DEH4_RAT]                                                               | 0.604966 | 1.67E-02 |
| B5DF57 | Erythrocyte protein band 4.2 OS=Rattus norvegicus GN=Epb42 PE=1 SV=1 - [B5DF57_RAT]                                                  | 0.605128 | 1.68E-02 |
| M0R835 | Protein Sf3b6 OS=Rattus norvegicus GN=Sf3b6 PE=1 SV=2 - [M0R835_RAT]                                                                 | 1.691383 | 1.70E-02 |
| Q4PP99 | Cardiac troponin C OS=Rattus norvegicus GN=Tnnc1 PE=1 SV=1 - [Q4PP99_RAT]                                                            | 0.605755 | 1.70E-02 |
| Q5RJR8 | Leucine-rich repeat-containing protein 59 OS=Rattus norvegicus GN=Lrrc59 PE=1 SV=1 - [LRC59_RAT]                                     | 0.606543 | 1.72E-02 |
| Q3KRE0 | ATPase family AAA domain-containing protein 3 OS=Rattus norvegicus GN=Atad3 PE=1 SV=1 - [ATAD3_RAT]                                  | 0.606461 | 1.72E-02 |
| Q63662 | UDP-glucuronosyltransferase OS=Rattus norvegicus GN=Ugt1a6 PE=1 SV=1 - [Q63662_RAT]                                                  | 0.606704 | 1.73E-02 |
| B2RZD6 | Ndufa4 protein OS=Rattus norvegicus GN=Ndufa4 PE=1 SV=1 - [B2RZD6_RAT]                                                               | 1.687368 | 1.74E-02 |
| D4A3V2 | NADH dehydrogenase [ubiquinone] 1 alpha subcomplex subunit 6 OS=Rattus norvegicus GN=Ndufa6 PE=1 SV=1 - [D4A3V2_RAT]                 | 1.683099 | 1.78E-02 |
| B1WBV4 | Pleckstrin homology domain containing, family F (With FYVE domain) member 2 OS=Rattus norvegicus GN=Plekhf2 PE=1 SV=1 - [B1WBV4_RAT] | 1.680272 | 1.81E-02 |
| P04642 | L-lactate dehydrogenase A chain OS=Rattus norvegicus GN=Ldha PE=1 SV=1 - [LDHA_RAT]                                                  | 1.679612 | 1.82E-02 |
| D4A5Y7 | Protein Rsph9 OS=Rattus norvegicus                                                                                                   | 0.609796 | 1.82E-02 |

|        |                                                                                                                          |          |          |
|--------|--------------------------------------------------------------------------------------------------------------------------|----------|----------|
|        | GN=Rsph9 PE=4 SV=1 -<br>[D4A5Y7_RAT]                                                                                     |          | 2        |
| Q675A5 | Group XV phospholipase A2<br>OS=Rattus norvegicus GN=Pla2g15<br>PE=1 SV=1 - [PAG15_RAT]                                  | 0.610236 | 1.84E-02 |
| Q4TU93 | C-type mannose receptor 2 OS=Rattus<br>norvegicus GN=Mrc2 PE=1 SV=1 -<br>[MRC2_RAT]                                      | 0.610538 | 1.85E-02 |
| M0RCH5 | Glucosamine-6-phosphate isomerase<br>OS=Rattus norvegicus GN=Gnpda1<br>PE=1 SV=2 - [M0RCH5_RAT]                          | 1.67268  | 1.89E-02 |
| Q5PQK2 | Fusion, derived from t(1216) malignant<br>liposarcoma (Human) OS=Rattus<br>norvegicus GN=Fus PE=1 SV=1 -<br>[Q5PQK2_RAT] | 1.672547 | 1.89E-02 |
| Q64268 | Heparin cofactor 2 OS=Rattus<br>norvegicus GN=Serpind1 PE=1 SV=1 -<br>[HEP2_RAT]                                         | 0.612051 | 1.90E-02 |
| Q9ER34 | Aconitate hydratase, mitochondrial<br>OS=Rattus norvegicus GN=Aco2 PE=1<br>SV=2 - [ACON_RAT]                             | 1.667984 | 1.94E-02 |
| Q4V8K5 | BRO1 domain-containing protein<br>BROX OS=Rattus norvegicus<br>GN=Brox PE=2 SV=1 - [BROX_RAT]                            | 0.613245 | 1.94E-02 |
| D3ZX63 | Protein LOC103692166 OS=Rattus<br>norvegicus GN=Wdr54 PE=4 SV=1 -<br>[D3ZX63_RAT]                                        | 0.613651 | 1.95E-02 |
| G3V9U1 | Centaurin, gamma 2 (Predicted)<br>OS=Rattus norvegicus GN=Agap1<br>PE=4 SV=1 - [G3V9U1_RAT]                              | 0.61374  | 1.96E-02 |
| P02793 | Ferritin light chain 1 OS=Rattus<br>norvegicus GN=Ftl1 PE=1 SV=3 -<br>[FRIL1_RAT]                                        | 0.614133 | 1.97E-02 |
| M0R692 | Protein Ighv1-22 OS=Rattus<br>norvegicus GN=Ighv1-22 PE=1 SV=1<br>- [M0R692_RAT]                                         | 1.664085 | 1.99E-02 |
| D3ZZT9 | Protein Col14a1 OS=Rattus norvegicus<br>GN=Col14a1 PE=1 SV=3 -<br>[D3ZZT9_RAT]                                           | 1.661589 | 2.02E-02 |
| F1M7F7 | Complement component C6 OS=Rattus<br>norvegicus GN=C6 PE=1 SV=3 -<br>[F1M7F7_RAT]                                        | 0.615455 | 2.02E-02 |
| Q497C3 | UPF0585 protein C16orf13 homolog<br>OS=Rattus norvegicus PE=2 SV=2 -                                                     | 0.615894 | 2.03E-02 |

|            |                                                                                                                     |          |          |
|------------|---------------------------------------------------------------------------------------------------------------------|----------|----------|
|            | [CP013_RAT]                                                                                                         |          |          |
| M0R919     | Prefoldin subunit 3 OS=Rattus norvegicus GN=Vbp1 PE=1 SV=2 - [M0R919_RAT]                                           | 1.659607 | 2.04E-02 |
| D4A830     | Protein Ppa2 OS=Rattus norvegicus GN=Ppa2 PE=1 SV=2 - [D4A830_RAT]                                                  | 0.61641  | 2.05E-02 |
| P49432     | Pyruvate dehydrogenase E1 component subunit beta, mitochondrial OS=Rattus norvegicus GN=Pdhh PE=1 SV=2 - [ODPB_RAT] | 1.657948 | 2.06E-02 |
| P56574     | Isocitrate dehydrogenase [NADP], mitochondrial OS=Rattus norvegicus GN=Idh2 PE=1 SV=2 - [IDHP_RAT]                  | 1.656158 | 2.08E-02 |
| P04636     | Malate dehydrogenase, mitochondrial OS=Rattus norvegicus GN=Mdh2 PE=1 SV=2 - [MDHM_RAT]                             | 1.655139 | 2.09E-02 |
| F1LP59     | Rab3 GTPase-activating protein catalytic subunit OS=Rattus norvegicus GN=Rab3gap1 PE=1 SV=3 - [F1LP59_RAT]          | 0.617512 | 2.09E-02 |
| P04904     | Glutathione S-transferase alpha-3 OS=Rattus norvegicus GN=Gsta3 PE=1 SV=3 - [GSTA3_RAT]                             | 1.654217 | 2.10E-02 |
| Q6AZ33     | Biliverdin reductase A OS=Rattus norvegicus GN=Blvra PE=1 SV=1 - [Q6AZ33_RAT]                                       | 0.618337 | 2.12E-02 |
| P70623     | Fatty acid-binding protein, adipocyte OS=Rattus norvegicus GN=Fabp4 PE=1 SV=3 - [FABP4_RAT]                         | 1.652318 | 2.13E-02 |
| Q6XDA0     | Erythroid spectrin beta OS=Rattus norvegicus GN=Sptb PE=1 SV=1 - [Q6XDA0_RAT]                                       | 0.619306 | 2.15E-02 |
| D3ZLF6     | Protein Snrpa1 OS=Rattus norvegicus GN=Snrpa1 PE=1 SV=3 - [D3ZLF6_RAT]                                              | 0.619543 | 2.16E-02 |
| D4A9A3     | Protein Cenpv OS=Rattus norvegicus GN=Cenpv PE=1 SV=3 - [D4A9A3_RAT]                                                | 1.646259 | 2.20E-02 |
| M0RA24     | Protein LOC103694107 OS=Rattus norvegicus GN=LOC103694107 PE=4 SV=2 - [M0RA24_RAT]                                  | 1.642344 | 2.25E-02 |
| A0A0G2JUF1 | Peroxisomal trans-2-enoyl-CoA reductase OS=Rattus norvegicus                                                        | 1.637786 | 2.31E-02 |

|            |                                                                                                                     |          |          |
|------------|---------------------------------------------------------------------------------------------------------------------|----------|----------|
|            | GN=Pecr PE=1 SV=1 -<br>[A0A0G2JUF1_RAT]<br>Non-histone chromosomal protein<br>HMG-17 OS=Rattus norvegicus           |          |          |
| P18437     | GN=Hmgn2 PE=1 SV=2 -<br>[HMGN2_RAT]                                                                                 | 1.631823 | 2.39E-02 |
| P62828     | GTP-binding nuclear protein Ran<br>OS=Rattus norvegicus GN=Ran PE=1<br>SV=3 - [RAN_RAT]                             | 1.628968 | 2.43E-02 |
| A0A096MKH4 | Protein Ube2j1 (Fragment) OS=Rattus<br>norvegicus GN=Ube2j1 PE=1 SV=1 -<br>[A0A096MKH4_RAT]                         | 1.626703 | 2.46E-02 |
| M0R5J4     | Uncharacterized protein OS=Rattus<br>norvegicus PE=3 SV=1 -<br>[M0R5J4_RAT]                                         | 1.626233 | 2.47E-02 |
| F1M7X3     | Protein Cdh13 OS=Rattus norvegicus<br>GN=Cdh13 PE=1 SV=3 -<br>[F1M7X3_RAT]                                          | 1.623711 | 2.50E-02 |
| P29066     | Beta-arrestin-1 OS=Rattus norvegicus<br>GN=Arrb1 PE=1 SV=1 -<br>[ARRB1_RAT]                                         | 1.618924 | 2.57E-02 |
| D3ZUL3     | Protein Col6a1 OS=Rattus norvegicus<br>GN=Col6a1 PE=1 SV=1 -<br>[D3ZUL3_RAT]                                        | 1.616718 | 2.61E-02 |
| P16303     | Carboxylesterase 1D OS=Rattus<br>norvegicus GN=Ces1d PE=1 SV=2 -<br>[CES1D_RAT]                                     | 1.616667 | 2.61E-02 |
| P08011     | Microsomal glutathione S-transferase 1<br>OS=Rattus norvegicus GN=Mgst1<br>PE=1 SV=3 - [MGST1_RAT]                  | 1.614325 | 2.64E-02 |
| A0A0G2JSU4 | N-myc downstream regulated gene 2,<br>isoform CRA_b OS=Rattus norvegicus<br>GN=Ndr2 PE=1 SV=1 -<br>[A0A0G2JSU4_RAT] | 1.613054 | 2.66E-02 |
| P15205     | Microtubule-associated protein 1B<br>OS=Rattus norvegicus GN=Map1b<br>PE=1 SV=2 - [MAP1B_RAT]                       | 1.609729 | 2.71E-02 |
| Q9Z2L0     | Voltage-dependent anion-selective<br>channel protein 1 OS=Rattus<br>norvegicus GN=Vdac1 PE=1 SV=4 -<br>[VDAC1_RAT]  | 1.605601 | 2.78E-02 |
| D4A3V5     | Protein Cgnl1 OS=Rattus norvegicus<br>GN=Cgnl1 PE=1 SV=1 -<br>[D4A3V5_RAT]                                          | 1.6      | 2.87E-02 |

|                |                                                                                                                                                  |          |              |
|----------------|--------------------------------------------------------------------------------------------------------------------------------------------------|----------|--------------|
| A0A0G2JSH5     | Serum albumin OS=Rattus norvegicus<br>GN=Alb PE=1 SV=1 -<br>[A0A0G2JSH5_RAT]                                                                     | 1.594444 | 2.96E-0<br>2 |
| A0A0G2K2X<br>3 | Protein Sf3a3 OS=Rattus norvegicus<br>GN=Sf3a3 PE=1 SV=1 -<br>[A0A0G2K2X3_RAT]                                                                   | 1.58588  | 3.10E-0<br>2 |
| P13803         | Electron transfer flavoprotein subunit<br>alpha, mitochondrial OS=Rattus<br>norvegicus GN=Etfa PE=1 SV=4 -<br>[ETFA_RAT]                         | 1.585544 | 3.11E-0<br>2 |
| D3ZRN3         | Protein Actbl2 OS=Rattus norvegicus<br>GN=Actbl2 PE=1 SV=1 -<br>[D3ZRN3_RAT]                                                                     | 1.583921 | 3.14E-0<br>2 |
| P41350         | Caveolin-1 OS=Rattus norvegicus<br>GN=Cav1 PE=1 SV=3 - [CAV1_RAT]                                                                                | 1.582465 | 3.16E-0<br>2 |
| A0A0G2K484     | Protein Myh1 OS=Rattus norvegicus<br>GN=Myh1 PE=1 SV=1 -<br>[A0A0G2K484_RAT]                                                                     | 1.581515 | 3.18E-0<br>2 |
| P69897         | Tubulin beta-5 chain OS=Rattus<br>norvegicus GN=Tubb5 PE=1 SV=1 -<br>[TBB5_RAT]                                                                  | 1.577199 | 3.26E-0<br>2 |
| D3ZCQ9         | Myeloid leukemia factor 1 (Predicted),<br>isoform CRA_a OS=Rattus norvegicus<br>GN=Mlf1 PE=1 SV=1 -<br>[D3ZCQ9_RAT]                              | 1.571906 | 3.36E-0<br>2 |
| Q561S0         | NADH dehydrogenase [ubiquinone] 1<br>alpha subcomplex subunit 10,<br>mitochondrial OS=Rattus norvegicus<br>GN=Ndufa10 PE=1 SV=1 -<br>[NDUAA_RAT] | 1.570492 | 3.38E-0<br>2 |
| O55158         | Tetraspanin OS=Rattus norvegicus<br>GN=Tspan8 PE=1 SV=2 -<br>[O55158_RAT]                                                                        | 1.56892  | 3.41E-0<br>2 |
| D3ZFY8         | Protein LOC100912618 OS=Rattus<br>norvegicus GN=LOC100912618 PE=1<br>SV=1 - [D3ZFY8_RAT]                                                         | 1.568353 | 3.42E-0<br>2 |
| G3V6V1         | Aminopeptidase B OS=Rattus<br>norvegicus GN=Rnpep PE=1 SV=1 -<br>[G3V6V1_RAT]                                                                    | 1.566964 | 3.45E-0<br>2 |
| Q03344         | ATPase inhibitor, mitochondrial<br>OS=Rattus norvegicus GN=Atpif1<br>PE=3 SV=2 - [ATIF1_RAT]                                                     | 1.565445 | 3.48E-0<br>2 |
| D3ZF77         | Protein Akr1cl OS=Rattus norvegicus<br>GN=Akr1cl PE=1 SV=1 -                                                                                     | 1.562401 | 3.54E-0<br>2 |

|        |                                                                                                     |          |          |
|--------|-----------------------------------------------------------------------------------------------------|----------|----------|
|        | [D3ZF77_RAT]                                                                                        |          |          |
| P61589 | Transforming protein RhoA OS=Rattus norvegicus GN=Rhoa PE=1 SV=1 - [RHOA_RAT]                       | 1.557439 | 3.64E-02 |
| P19945 | 60S acidic ribosomal protein P0 OS=Rattus norvegicus GN=Rplp0 PE=1 SV=2 - [RLA0_RAT]                | 1.556338 | 3.66E-02 |
| G3V6H0 | Protein LOC100363782 OS=Rattus norvegicus GN=LOC100363782 PE=3 SV=1 - [G3V6H0_RAT]                  | 1.550576 | 3.78E-02 |
| Q9Z118 | Polypyrimidine tract-binding protein 3 OS=Rattus norvegicus GN=Ptbp3 PE=2 SV=1 - [PTBP3_RAT]        | 1.550797 | 3.78E-02 |
| Q5XIF6 | Tubulin alpha-4A chain OS=Rattus norvegicus GN=Tuba4a PE=1 SV=1 - [TBA4A_RAT]                       | 1.547525 | 3.85E-02 |
| B5DEP0 | Dguok protein OS=Rattus norvegicus GN=Dguok PE=2 SV=1 - [B5DEP0_RAT]                                | 1.546209 | 3.88E-02 |
| Q63258 | Integrin alpha-7 OS=Rattus norvegicus GN=Itga7 PE=1 SV=2 - [ITA7_RAT]                               | 1.543002 | 3.94E-02 |
| D4A7R3 | Nucleoporin 205kDa (Predicted) OS=Rattus norvegicus GN=Nup205 PE=1 SV=1 - [D4A7R3_RAT]              | 1.539715 | 4.02E-02 |
| P16228 | Cathepsin E OS=Rattus norvegicus GN=Ctse PE=1 SV=3 - [CATE_RAT]                                     | 1.536937 | 4.08E-02 |
| O88656 | Actin-related protein 2/3 complex subunit 1B OS=Rattus norvegicus GN=Arpc1b PE=1 SV=3 - [ARC1B_RAT] | 1.533708 | 4.15E-02 |
| B0BNM1 | NAD(P)H-hydrate epimerase OS=Rattus norvegicus GN=Apoa1bp PE=2 SV=1 - [NNRE_RAT]                    | 1.533333 | 4.16E-02 |
| M0R660 | Glyceraldehyde-3-phosphate dehydrogenase OS=Rattus norvegicus PE=1 SV=1 - [M0R660_RAT]              | 1.532961 | 4.17E-02 |
| B3IYD2 | Ufm1-conjugating enzyme 1, isoform CRA_a OS=Rattus norvegicus GN=Ufc1 PE=2 SV=1 - [B3IYD2_RAT]      | 1.532189 | 4.19E-02 |
| P45592 | Cofilin-1 OS=Rattus norvegicus GN=Cfl1 PE=1 SV=3 - [COF1_RAT]                                       | 1.529976 | 4.24E-02 |
| F7FKI5 | Pyruvate dehydrogenase E1 component subunit alpha OS=Rattus norvegicus                              | 1.525708 | 4.34E-02 |

|            |                                                                                                                            |          |          |
|------------|----------------------------------------------------------------------------------------------------------------------------|----------|----------|
|            | GN=Pdha1 PE=1 SV=2 -<br>[F7FKI5_RAT]                                                                                       |          |          |
| A0A0G2K2M9 | Protein Srrm2 OS=Rattus norvegicus<br>GN=Srrm2 PE=1 SV=1 -<br>[A0A0G2K2M9_RAT]                                             | 1.524932 | 4.36E-02 |
| B2RZC6     | Ilf2 protein OS=Rattus norvegicus<br>GN=Ilf2 PE=1 SV=1 -<br>[B2RZC6_RAT]                                                   | 1.524762 | 4.36E-02 |
| I6L9G6     | Protein Tardbp OS=Rattus norvegicus<br>GN=Tardbp PE=1 SV=1 -<br>[I6L9G6_RAT]                                               | 1.52429  | 4.37E-02 |
| Q6AY18     | Protein Ppa1 OS=Rattus norvegicus<br>GN=Sar1a PE=1 SV=1 -<br>[Q6AY18_RAT]                                                  | 1.521472 | 4.44E-02 |
| Q6LDP3     | Rat glutathione S-transferase<br>OS=Rattus norvegicus GN=Gstm1<br>PE=2 SV=1 - [Q6LDP3_RAT]                                 | 1.521429 | 4.44E-02 |
| Q99NA5     | Isocitrate dehydrogenase [NAD]<br>subunit alpha, mitochondrial<br>OS=Rattus norvegicus GN=Idh3a<br>PE=1 SV=1 - [IDH3A_RAT] | 1.521042 | 4.45E-02 |
| B2RZ77     | Dermatopontin (Predicted), isoform<br>CRA_a OS=Rattus norvegicus<br>GN=Dpt PE=1 SV=1 -<br>[B2RZ77_RAT]                     | 1.520087 | 4.48E-02 |
| Q6P6R2     | Dihydrolipoyl dehydrogenase,<br>mitochondrial OS=Rattus norvegicus<br>GN=Dld PE=1 SV=1 - [DLDH_RAT]                        | 1.518868 | 4.51E-02 |

---
